# Supplementary material for: Synthesis and Evaluation of Novel Ligustrazine Derivatives as Multi-Targeted Inhibitors for the Treatment of Alzheimer’s Disease
Source: PubMed Central journal article supplement (PMC6222487; doi:10.3390/molecules23102540), 2018-10-05
Supplement: molecules-23-02540-s001.pdf [file molecules-23-02540-s001.pdf]

**Supporting Information**  
**for**  
**Synthesis and Evaluation of Novel Ligustrazine Derivatives as**  
**Multi-Targeted Inhibitors for the Treatment of Alzheimer's**  
**Disease**

Wenhao Wu<sup>†</sup>, Xintong Liang<sup>†</sup>, Guoquan Xie, Langdi Chen, Weixiong Liu, Guolin Luo,  
Peiquan Zhang, Lihong Yu, Xuehua Zheng, Hong Ji, Chao Zhang\* and Wei Yi\*

Key Laboratory of Molecular Target & Clinical Pharmacology, School of  
Pharmaceutical Sciences, Guangzhou Medical University, Guangzhou 511436,  
Guangdong, China

Email: chao-zh@163.com and yiwei@gzhmu.edu.cn.

<sup>†</sup> These authors contributed equally to this work

$^1\text{H}$  NMR (300 MHz,  $\text{CDCl}_3$ ) of **8a**

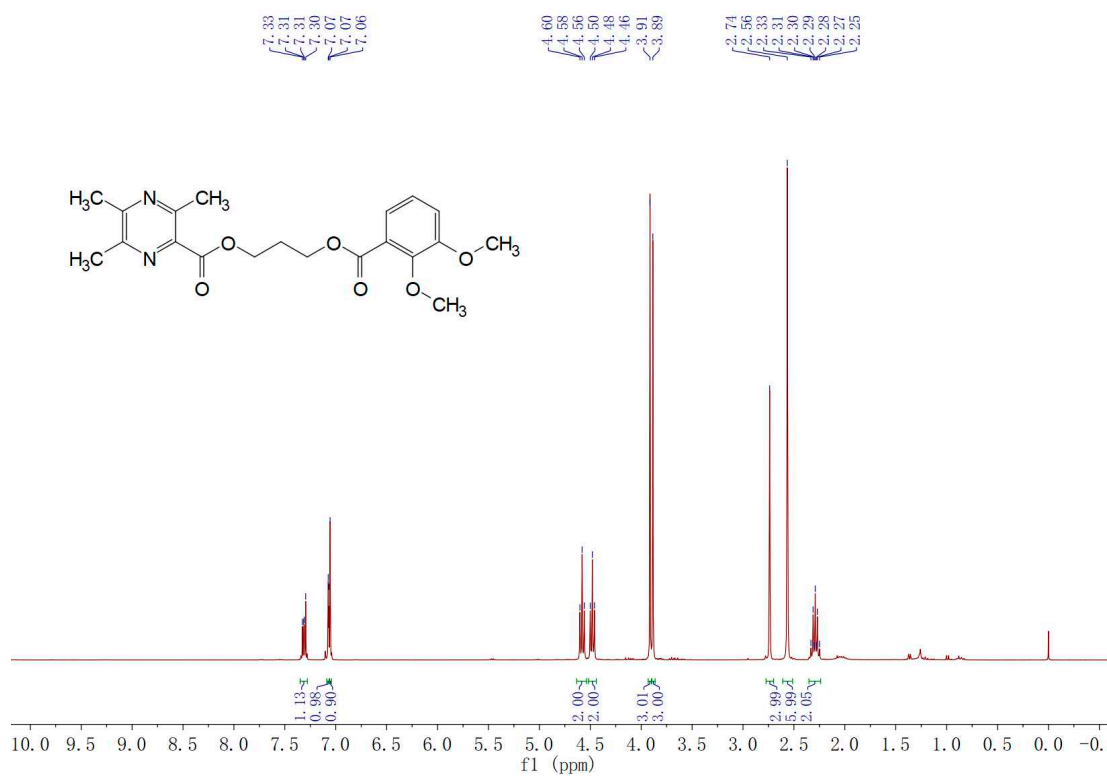

$^{13}\text{C}$  NMR (75 MHz,  $\text{CDCl}_3$ ) of **8a**

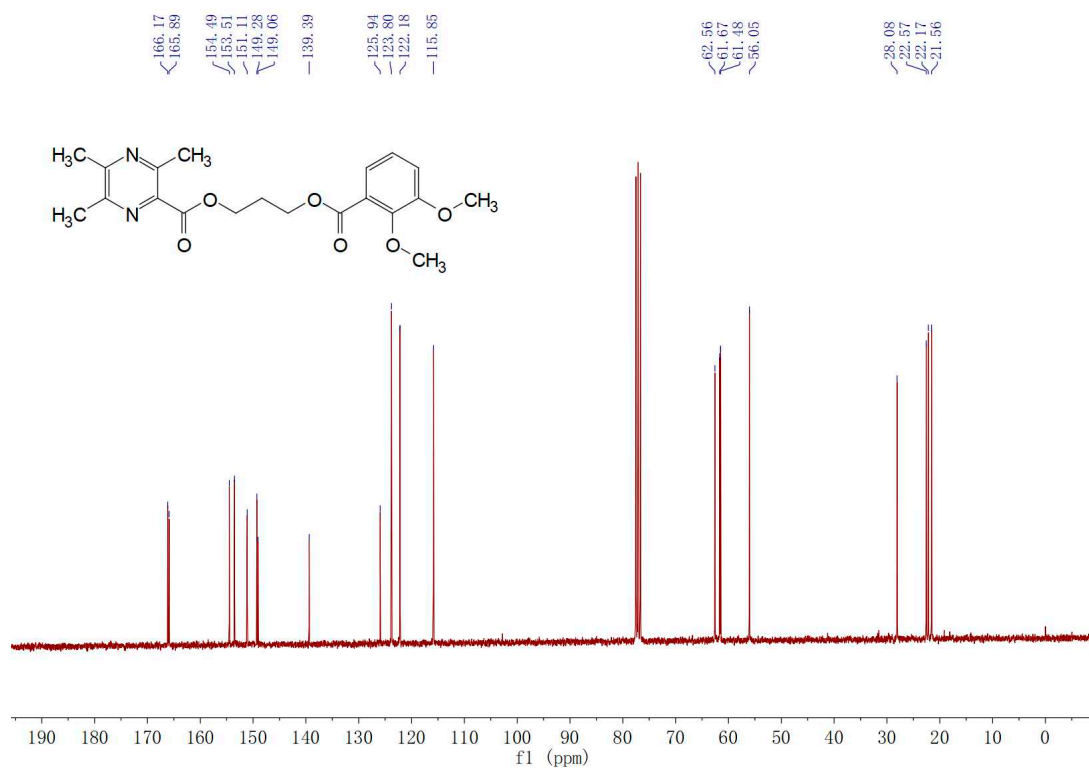

# HRMS spectra of 8a

Formula Predictor Report - 13.lcd

Page 1 of 1

Data File: I:\20170411-GY13.lcd

| Elmt | Val. | Min | Max | Elmt | Val. | Min | Max | Elmt | Val. | Min | Max | Elmt | Val. | Min | Max | Use Adduct |
|------|------|-----|-----|------|------|-----|-----|------|------|-----|-----|------|------|-----|-----|------------|
| H    | 1    | 0   | 60  | O    | 2    | 0   | 6   | P    | 3    | 0   | 0   | Cu   | 2    | 0   | 0   | H          |
| B    | 3    | 0   | 0   | 18O  | 2    | 0   | 0   | S    | 2    | 0   | 0   | Br   | 1    | 0   | 1   | Na         |
| C    | 4    | 0   | 50  | F    | 1    | 0   | 1   | Cl   | 1    | 0   | 0   | I    | 3    | 0   | 0   |            |
| N    | 3    | 0   | 5   | Si   | 4    | 0   | 0   | Ni   | 2    | 0   | 0   |      |      |     |     |            |

Error Margin (ppm): 20

HC Ratio: unlimited  
Max Isotopes: all  
MSn Iso RI (%): 75.00

DBE Range: -2.0 - 1000.0

Apply N Rule: yes  
Isotope RI (%): 1.00  
MSn Logic Mode: AND

Electron Ions: both

Use MSn Info: no  
Isotope Res: 10000  
Max Results: 500

Event#: 1 MS(E+) Ret. Time : 1.120 Scan#: 169

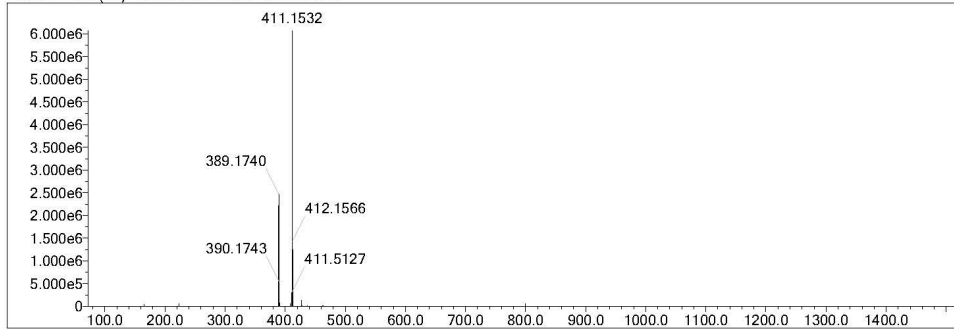

Measured region for 411.1532 m/z

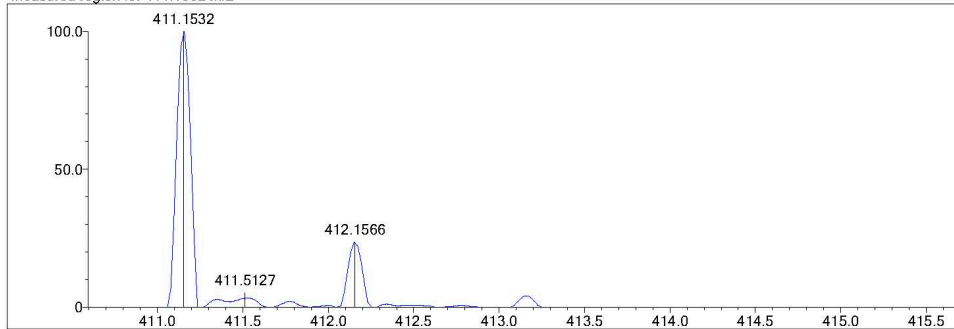

C20 H24 N2 O6 [M+Na]<sup>+</sup> : Predicted region for 411.1527 m/z

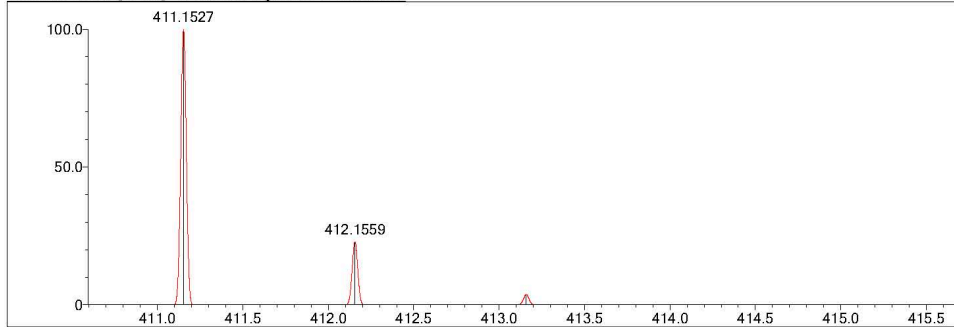

| Rank | Score | Formula (M)   | Ion                 | Meas. m/z | Pred. m/z | Df. (mDa) | Df. (ppm) | Iso   | DBE  |
|------|-------|---------------|---------------------|-----------|-----------|-----------|-----------|-------|------|
| 1    | 88.64 | C20 H24 N2 O6 | [M+Na] <sup>+</sup> | 411.1532  | 411.1527  | 0.5       | 1.22      | 89.13 | 10.0 |

$^1\text{H}$  NMR (300 MHz,  $\text{CDCl}_3$ ) of **8b**

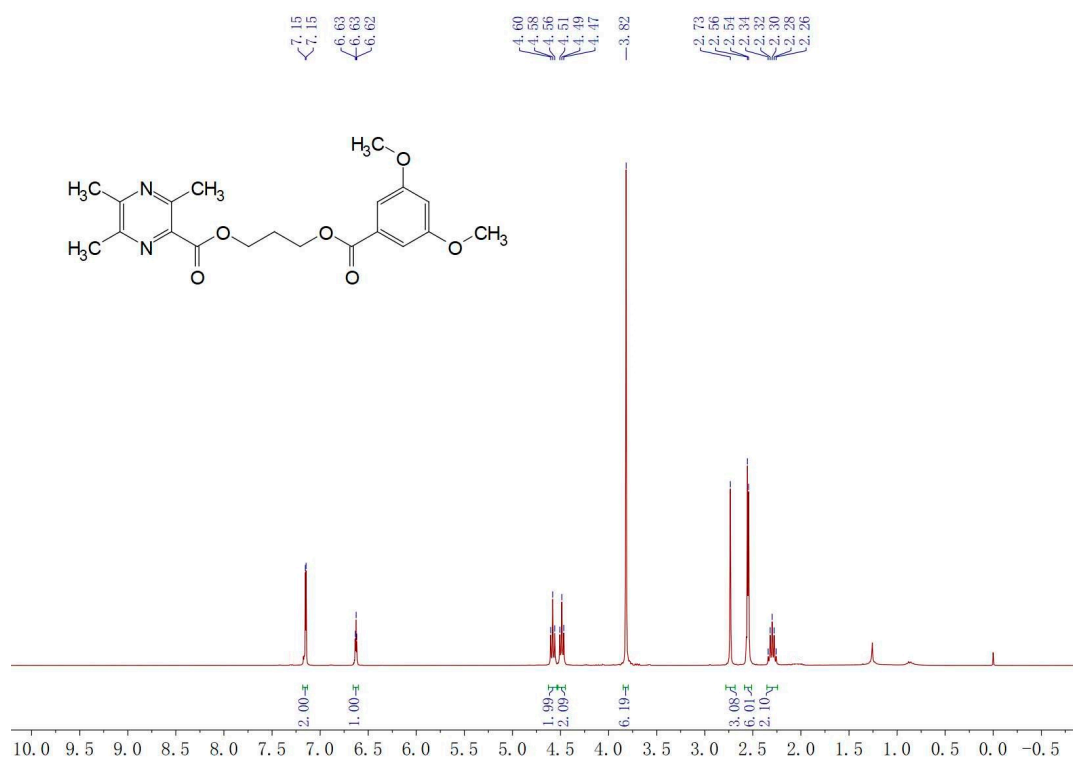

$^{13}\text{C}$  NMR (75 MHz,  $\text{CDCl}_3$ ) of **8b**

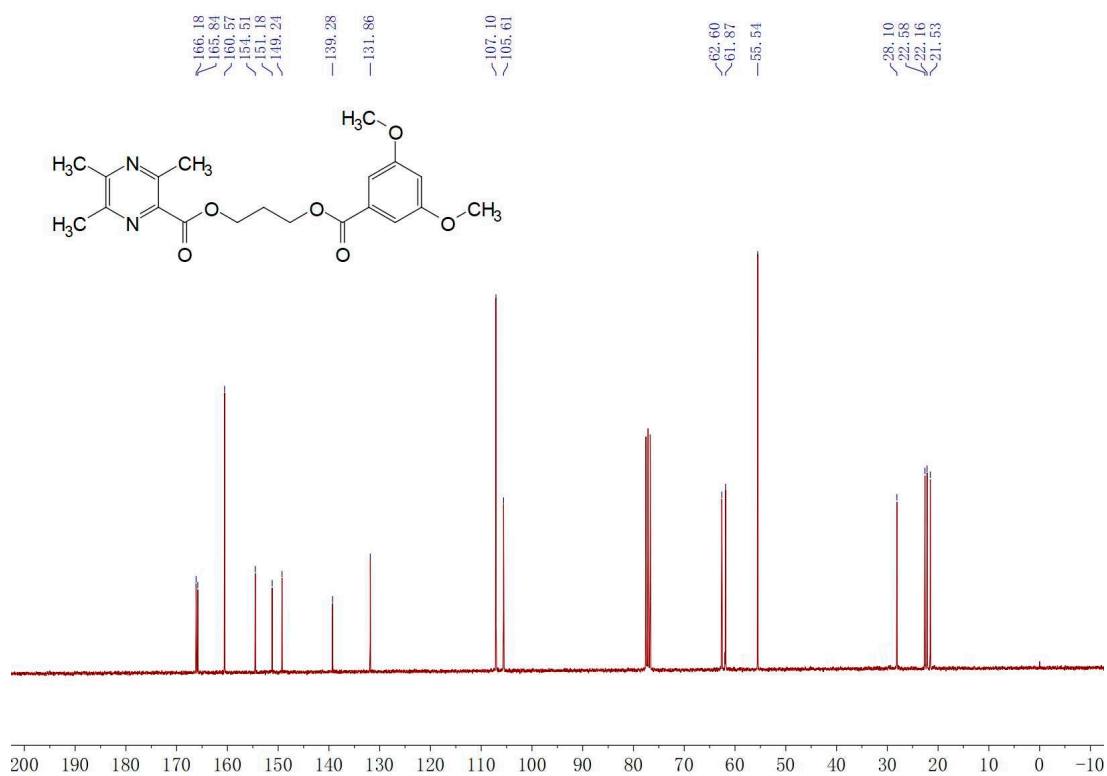



# HRMS spectra of **8b**

Formula Predictor Report - 14.lcd

Page 1 of 1

Data File: I:\20170411-GY\14.lcd

| Elmt | Val. | Min | Max | Elmt | Val. | Min | Max | Elmt | Val. | Min | Max | Elmt | Val. | Min | Max | Use Adduct |
|------|------|-----|-----|------|------|-----|-----|------|------|-----|-----|------|------|-----|-----|------------|
| H    | 1    | 0   | 60  | O    | 2    | 0   | 6   | P    | 3    | 0   | 0   | Cu   | 2    | 0   | 0   | H          |
| B    | 3    | 0   | 0   | 18O  | 2    | 0   | 0   | S    | 2    | 0   | 0   | Br   | 1    | 0   | 1   | Na         |
| C    | 4    | 0   | 50  | F    | 1    | 0   | 1   | Cl   | 1    | 0   | 0   | I    | 3    | 0   | 0   |            |
| N    | 3    | 0   | 5   | Si   | 4    | 0   | 0   | Ni   | 2    | 0   | 0   |      |      |     |     |            |

Error Margin (ppm): 20  
 HC Ratio: unlimited  
 Max Isotopes: all  
 MSn Iso RI (%): 75.00

DBE Range: -2.0 - 1000.0  
 Apply N Rule: yes  
 Isotope RI (%): 1.00  
 MSn Logic Mode: AND

Electron Ions: both  
 Use MSn Info: no  
 Isotope Res: 10000  
 Max Results: 500

Event#: 1 MS(E+) Ret. Time : 1.027 - 1.080 -> 1.242 Scan#: 155 - 163 -> 187

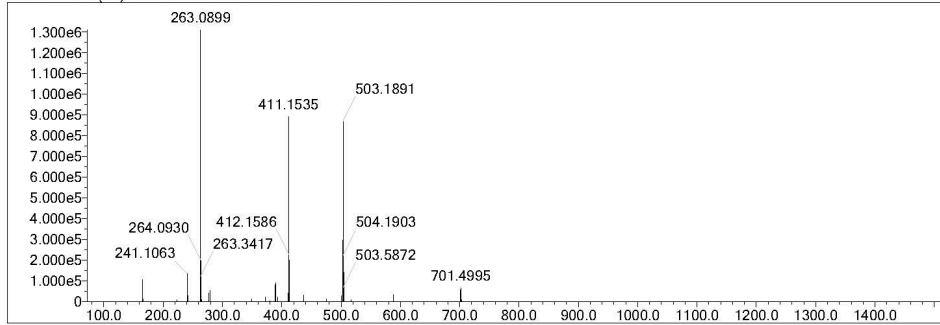

Measured region for 411.1535 m/z

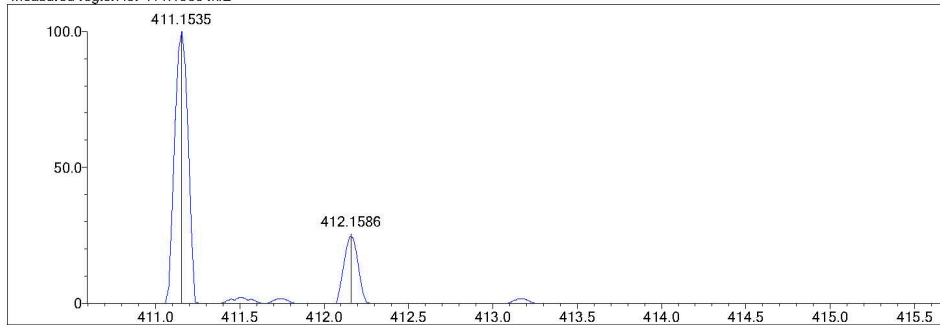

C20 H24 N2 O6 [M+Na]+ : Predicted region for 411.1527 m/z

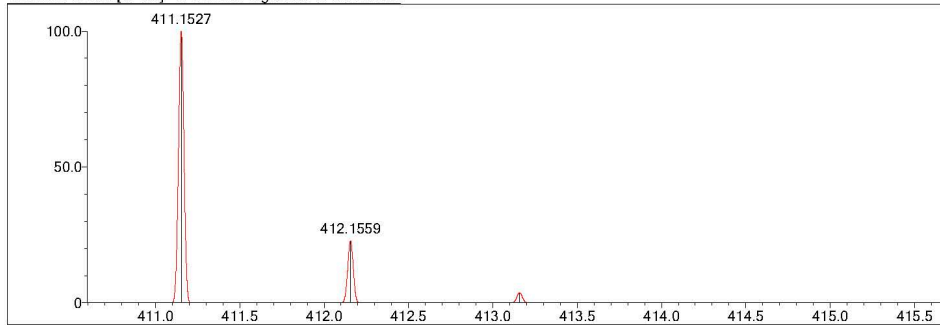

| Rank | Score | Formula (M)   | Ion     | Meas. m/z | Pred. m/z | Df. (mDa) | Df. (ppm) | Iso   | DBE  |
|------|-------|---------------|---------|-----------|-----------|-----------|-----------|-------|------|
| 1    | 79.85 | C20 H24 N2 O6 | [M+Na]+ | 411.1535  | 411.1527  | 0.8       | 1.95      | 81.80 | 10.0 |

$^1\text{H}$  NMR (300 MHz,  $\text{CDCl}_3$ ) of **8c**

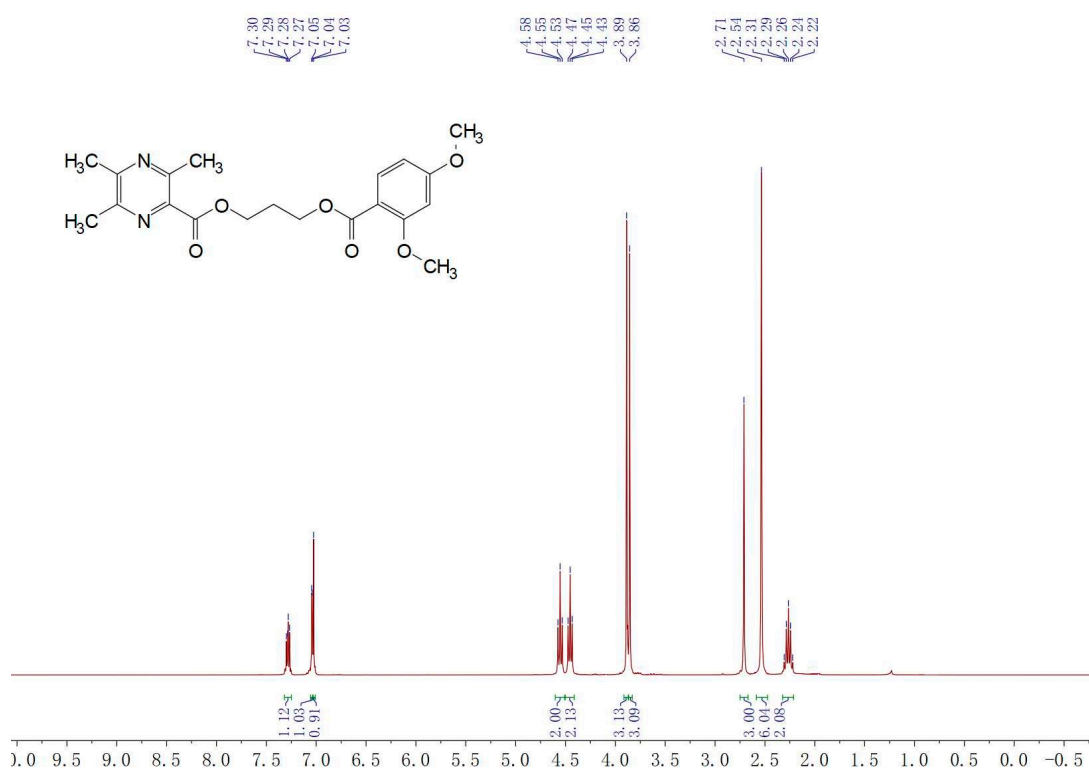

$^{13}\text{C}$  NMR (75 MHz,  $\text{CDCl}_3$ ) of **8c**

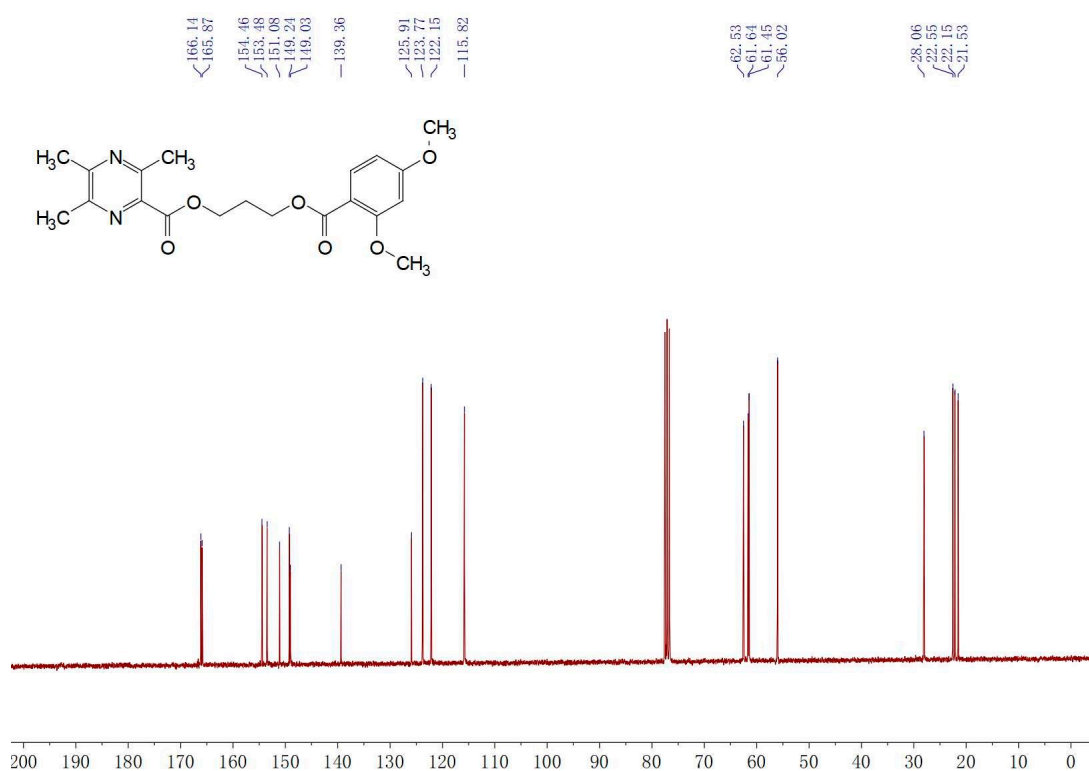

# HRMS spectra of **8c**

Formula Predictor Report - 16.Icd

Page 1 of 1

Data File: I:\20170411-GY\16.Icd

| Elmt | Val. | Min | Max | Elmt | Val. | Min | Max | Elmt | Val. | Min | Max | Elmt | Val. | Min | Max | Use Adduct |
|------|------|-----|-----|------|------|-----|-----|------|------|-----|-----|------|------|-----|-----|------------|
| H    | 1    | 0   | 60  | O    | 2    | 0   | 7   | P    | 3    | 0   | 0   | Cu   | 2    | 0   | 0   | H          |
| B    | 3    | 0   | 0   | 18O  | 2    | 0   | 0   | S    | 2    | 0   | 0   | Br   | 1    | 0   | 1   | Na         |
| C    | 4    | 0   | 50  | F    | 1    | 0   | 1   | Cl   | 1    | 0   | 0   | I    | 3    | 0   | 0   |            |
| N    | 3    | 0   | 5   | Si   | 4    | 0   | 0   | Ni   | 2    | 0   | 0   |      |      |     |     |            |

Error Margin (ppm): 20  
 HC Ratio: unlimited  
 Max Isotopes: all  
 MSn Iso RI (%): 75.00

DBE Range: -2.0 - 1000.0  
 Apply N Rule: yes  
 Isotope RI (%): 1.00  
 MSn Logic Mode: AND

Electron Ions: both  
 Use MSn Info: no  
 Isotope Res: 10000  
 Max Results: 500

Event#: 1 MS(E+) Ret. Time : 1.187 - 1.240 -> 1.439 Scan#: 179 - 187 -> 217

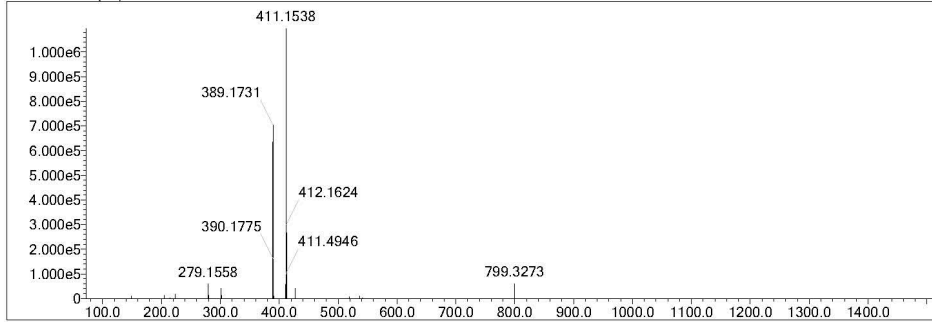

Measured region for 411.1538 m/z

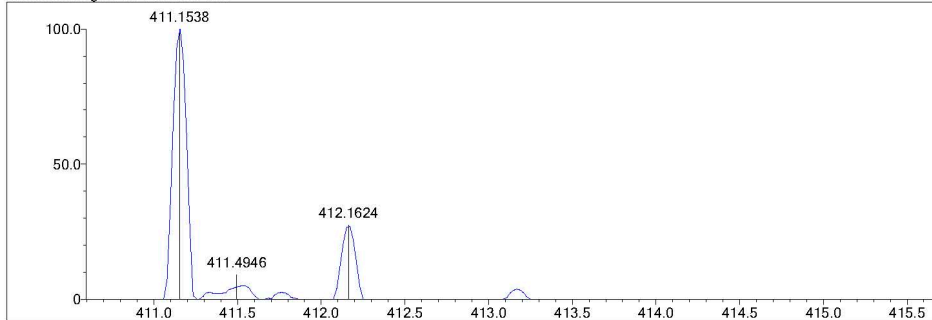

C20 H24 N2 O6 [M+Na]+ : Predicted region for 411.1527 m/z

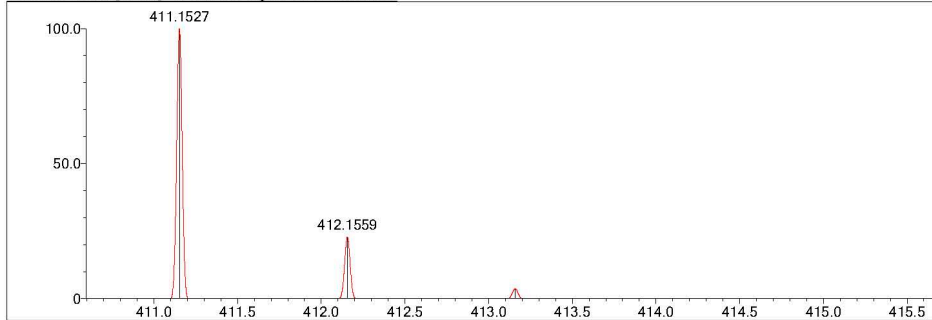

| Rank | Score | Formula (M)   | Ion                 | Meas. m/z | Pred. m/z | Df. (mDa) | Df. (ppm) | Iso   | DBE  |
|------|-------|---------------|---------------------|-----------|-----------|-----------|-----------|-------|------|
| 2    | 79.58 | C20 H24 N2 O6 | [M+Na] <sup>+</sup> | 411.1538  | 411.1527  | 1.1       | 2.68      | 83.07 | 10.0 |



# HRMS spectra of **8d**

Formula Predictor Report - 17.lcd

Page 1 of 1

Data File: I:\20170411-GY17.lcd

| Elmt | Val. | Min | Max | Elmt | Val. | Min | Max | Elmt | Val. | Min | Max | Elmt | Val. | Min | Max | Use Adduct |
|------|------|-----|-----|------|------|-----|-----|------|------|-----|-----|------|------|-----|-----|------------|
| H    | 1    | 0   | 60  | O    | 2    | 0   | 7   | P    | 3    | 0   | 0   | Cu   | 2    | 0   | 0   | H          |
| B    | 3    | 0   | 0   | 18O  | 2    | 0   | 0   | S    | 2    | 0   | 0   | Br   | 1    | 0   | 1   | Na         |
| C    | 4    | 0   | 50  | F    | 1    | 0   | 1   | Cl   | 1    | 0   | 0   | I    | 3    | 0   | 0   |            |
| N    | 3    | 0   | 5   | Si   | 4    | 0   | 0   | Ni   | 2    | 0   | 0   |      |      |     |     |            |

Error Margin (ppm): 20  
 HC Ratio: unlimited  
 Max Isotopes: all  
 MSn Iso RI (%): 75.00

DBE Range: -2.0 - 1000.0  
 Apply N Rule: yes  
 Isotope RI (%): 1.00  
 MSn Logic Mode: AND

Electron Ions: both  
 Use MSn Info: no  
 Isotope Res: 10000  
 Max Results: 500

Event#: 1 MS(E+) Ret. Time : 1.187 - 1.280 -> 1.555 Scan#: 179 - 193 -> 235

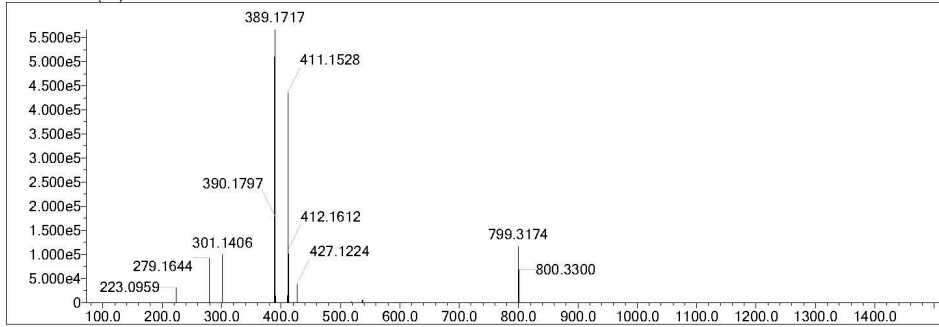

Measured region for 411.1528 m/z

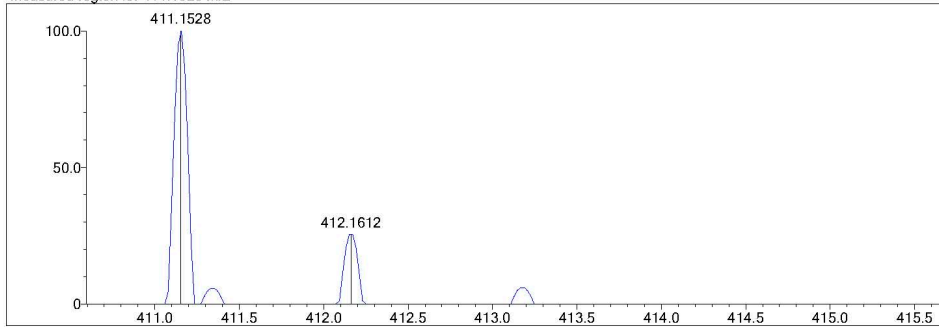

C20 H24 N2 O6 [M+Na]+ : Predicted region for 411.1527 m/z

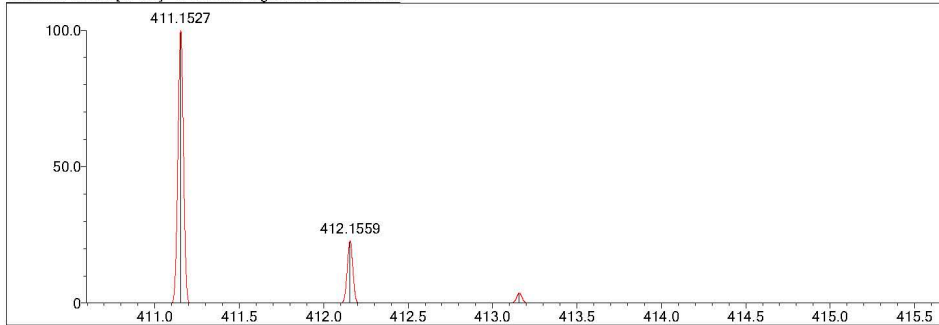

| Rank | Score | Formula (M)   | Ion     | Meas. m/z | Pred. m/z | Df. (mDa) | Df. (ppm) | Iso   | DBE  |
|------|-------|---------------|---------|-----------|-----------|-----------|-----------|-------|------|
| 1    | 72.02 | C20 H24 N2 O6 | [M+Na]+ | 411.1528  | 411.1527  | 0.1       | 0.24      | 72.02 | 10.0 |

$^1\text{H}$  NMR (300 MHz,  $\text{CDCl}_3$ ) of **8e**

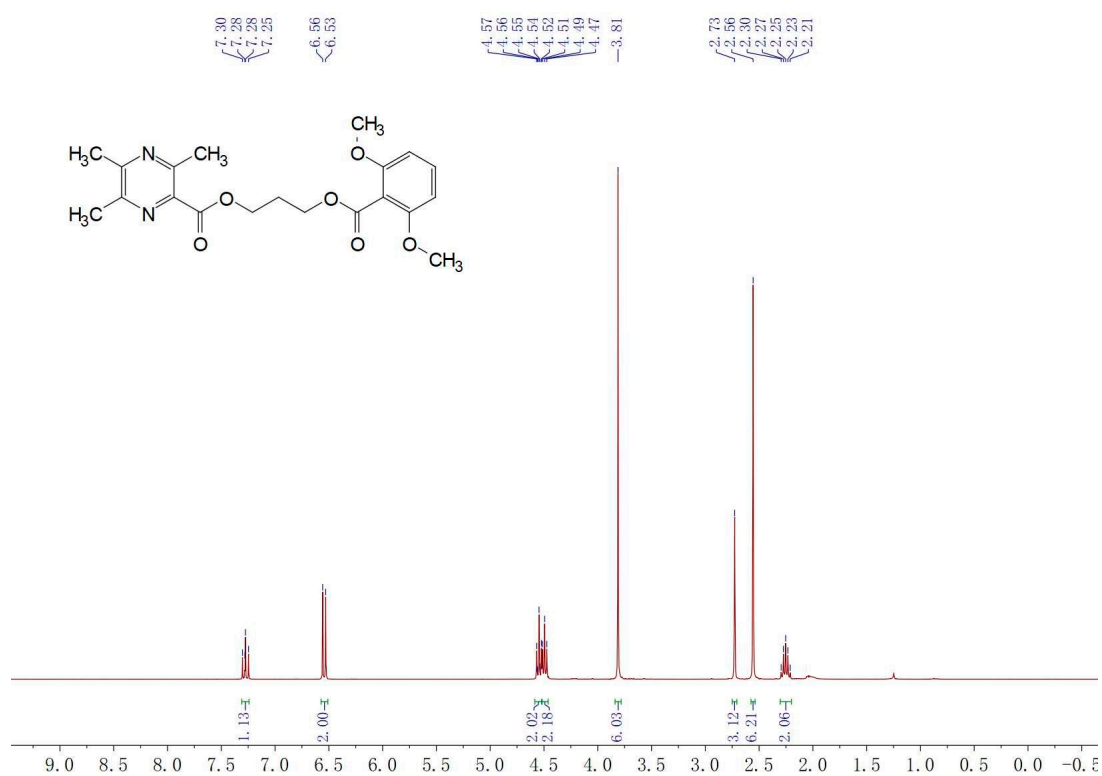

$^{13}\text{C}$  NMR (75 MHz,  $\text{CDCl}_3$ ) of **8e**

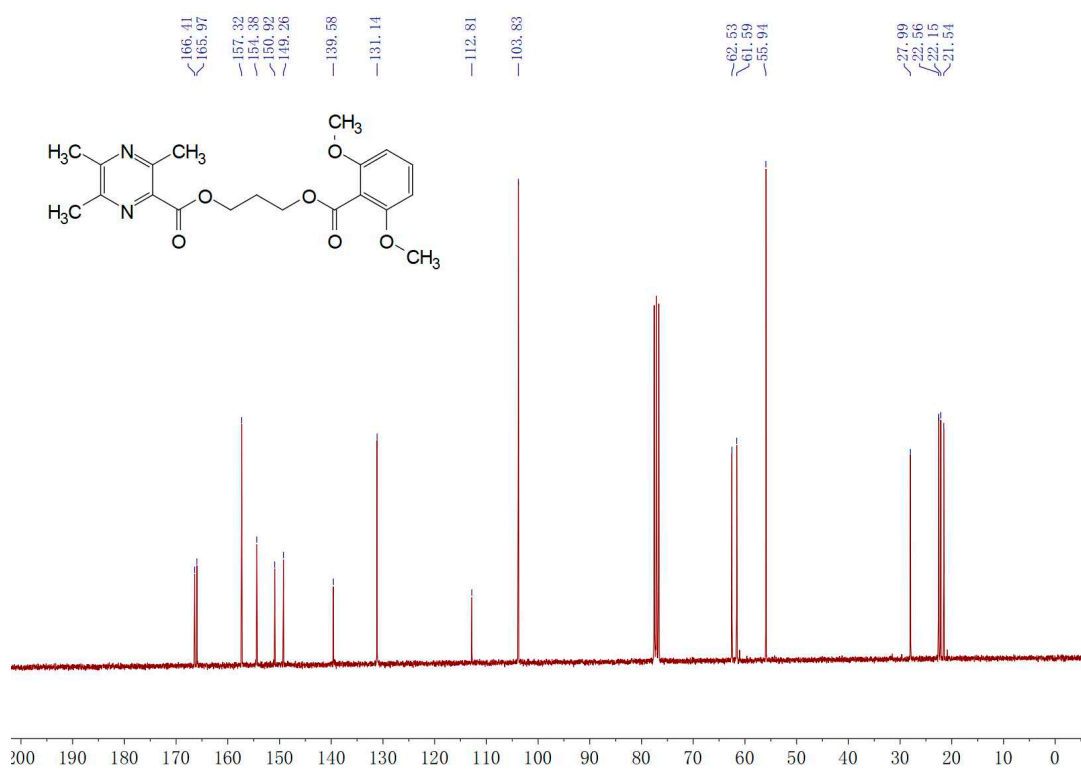

# HRMS spectra of 8e

Formula Predictor Report - 20.Icd

Page 1 of 1

Data File: I:\20170411-GY20.Icd

| Elmt | Val. | Min | Max | Elmt            | Val. | Min | Max | Elmt | Val. | Min | Max | Elmt | Val. | Min | Max | Use Adduct |
|------|------|-----|-----|-----------------|------|-----|-----|------|------|-----|-----|------|------|-----|-----|------------|
| H    | 1    | 0   | 60  | O               | 2    | 0   | 7   | P    | 3    | 0   | 0   | Cu   | 2    | 0   | 0   | H          |
| B    | 3    | 0   | 0   | <sup>18</sup> O | 2    | 0   | 0   | S    | 2    | 0   | 0   | Br   | 1    | 0   | 1   | Na         |
| C    | 4    | 0   | 50  | F               | 1    | 0   | 1   | Cl   | 1    | 0   | 0   | I    | 3    | 0   | 0   |            |
| N    | 3    | 0   | 5   | Si              | 4    | 0   | 0   | Ni   | 2    | 0   | 0   |      |      |     |     |            |

Error Margin (ppm): 20  
 DBE Range: -2.0 - 1000.0  
 Electron Ions: both  
 HC Ratio: unlimited  
 Apply N Rule: yes  
 Use MSn Info: no  
 Max Isotopes: all  
 Isotope RI (%): 1.00  
 Isotope Res: 10000  
 MSn Iso RI (%): 75.00  
 MSn Logic Mode: AND  
 Max Results: 500

Event#: 1 MS(E+) Ret. Time : 0.987 - 1.080 -> 1.278 Scan#: 149 - 163 -> 193

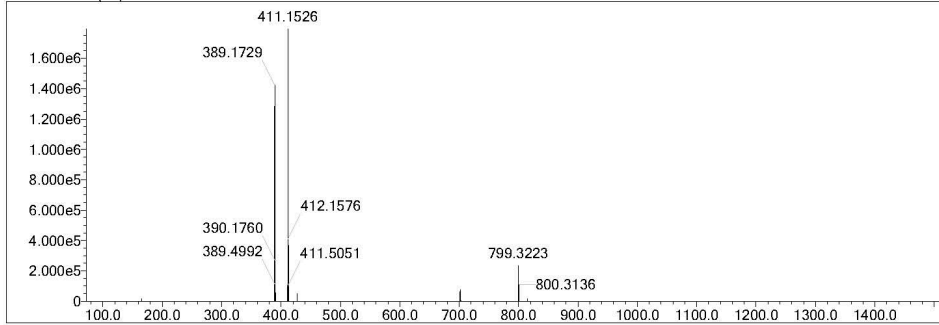

Measured region for 411.1526 m/z

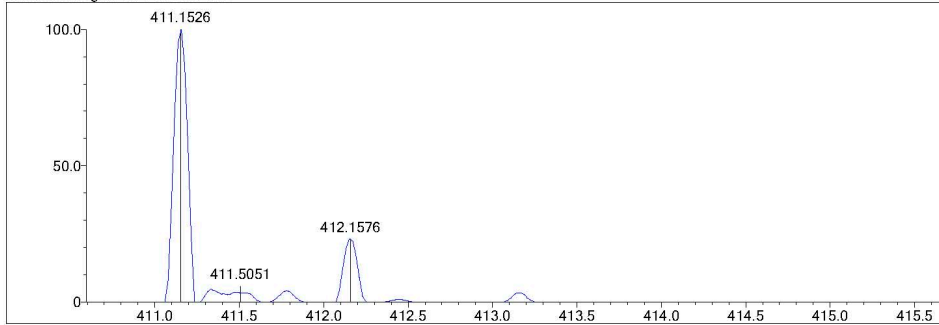

C20 H24 N2 O6 [M+Na]+ : Predicted region for 411.1527 m/z

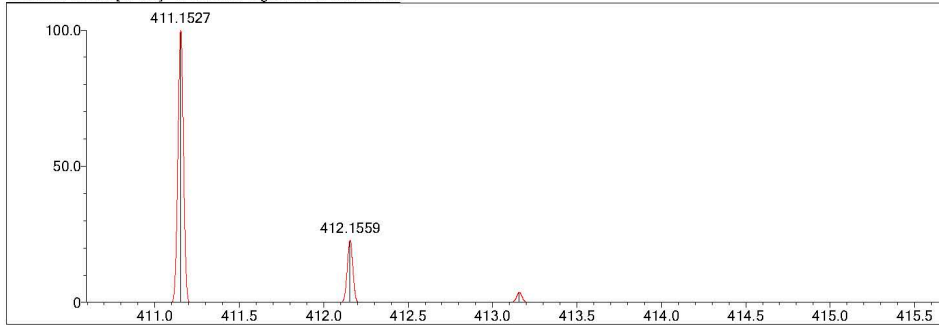

| Rank | Score | Formula (M)   | Ion     | Meas. m/z | Pred. m/z | Df. (mDa) | Df. (ppm) | Iso   | DBE  |
|------|-------|---------------|---------|-----------|-----------|-----------|-----------|-------|------|
| 1    | 88.17 | C20 H24 N2 O6 | [M+Na]+ | 411.1526  | 411.1527  | -0.1      | -0.24     | 88.17 | 10.0 |

$^1\text{H}$  NMR (300 MHz,  $\text{CDCl}_3$ ) of **8f**

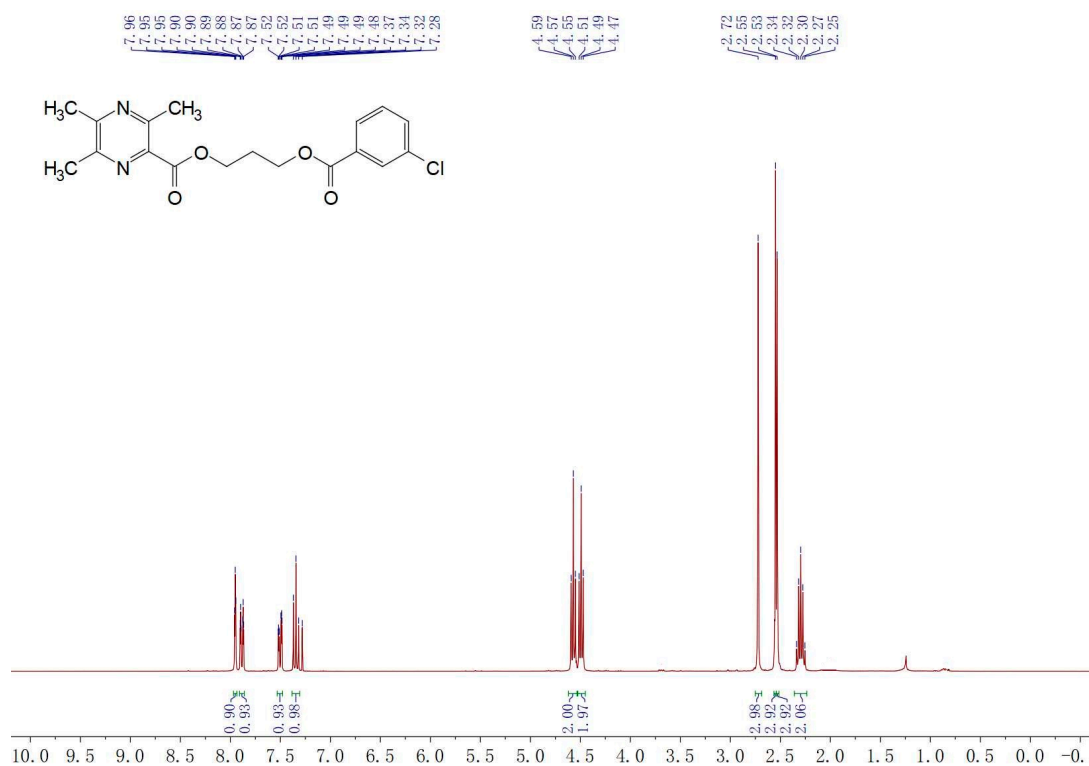

$^{13}\text{C}$  NMR (75 MHz,  $\text{CDCl}_3$ ) of **8f**

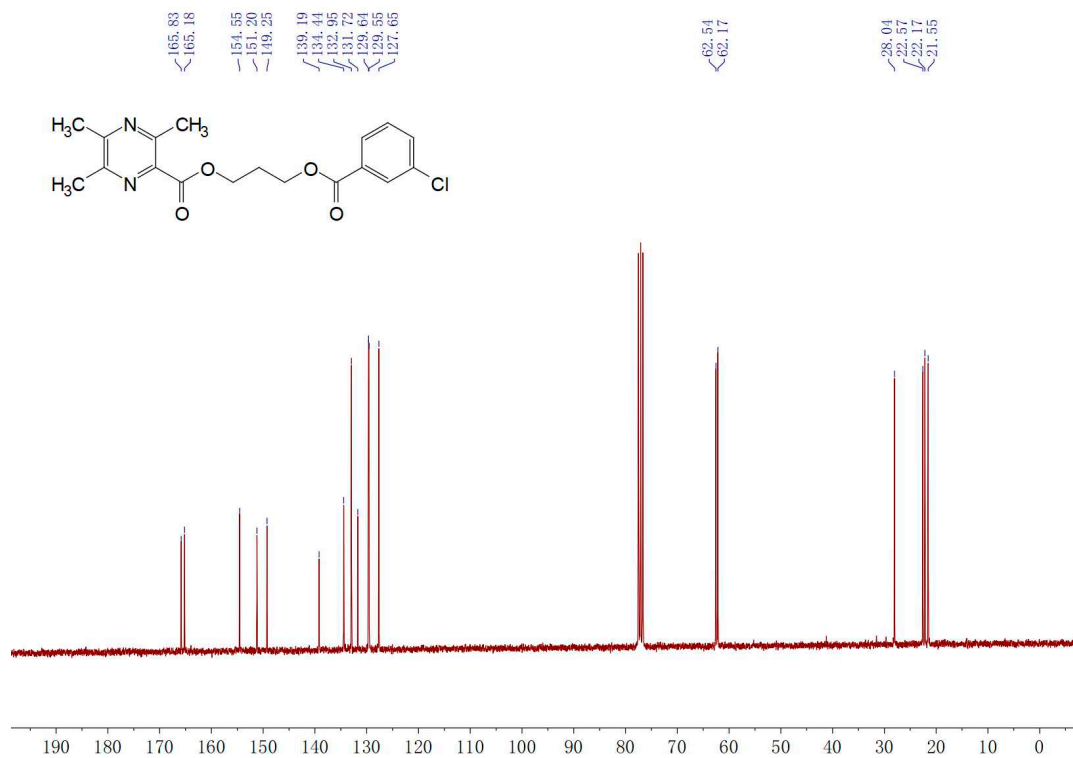



# HRMS spectra of **8f**

Formula Predictor Report - 23.Icd

Page 1 of 1

Data File: I:\20170411-GY\23.Icd

| Elmt | Val. | Min | Max | Elmt | Val. | Min | Max | Elmt | Val. | Min | Max | Elmt | Val. | Min | Max | Use Adduct |
|------|------|-----|-----|------|------|-----|-----|------|------|-----|-----|------|------|-----|-----|------------|
| H    | 1    | 0   | 60  | O    | 2    | 0   | 7   | P    | 3    | 0   | 0   | Cu   | 2    | 0   | 0   | H          |
| B    | 3    | 0   | 0   | 18O  | 2    | 0   | 0   | S    | 2    | 0   | 0   | Br   | 1    | 0   | 1   | Na         |
| C    | 4    | 0   | 50  | F    | 1    | 0   | 0   | Cl   | 1    | 0   | 1   | I    | 3    | 0   | 0   |            |
| N    | 3    | 0   | 5   | Si   | 4    | 0   | 0   | Ni   | 2    | 0   | 0   |      |      |     |     |            |

Error Margin (ppm): 20  
 HC Ratio: unlimited  
 Max Isotopes: all  
 MSn Iso RI (%): 75.00

DBE Range: -2.0 - 1000.0  
 Apply N Rule: yes  
 Isotope RI (%): 1.00  
 MSn Logic Mode: AND

Electron Ions: both  
 Use MSn Info: no  
 Isotope Res: 10000  
 Max Results: 500

Event#: 1 MS(E+) Ret. Time : 1.107 Scan#: 167

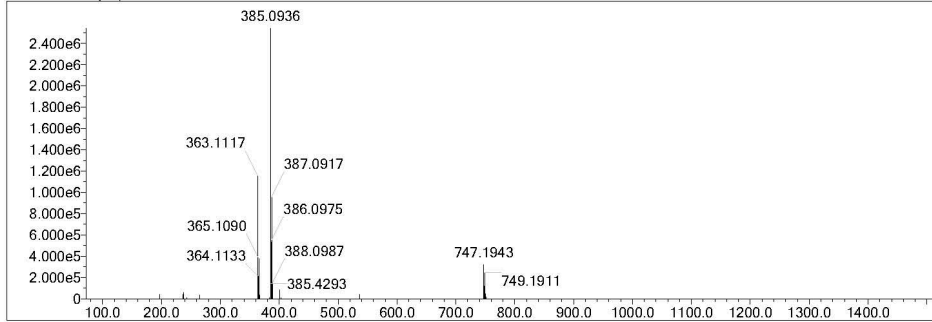

Measured region for 385.0936 m/z

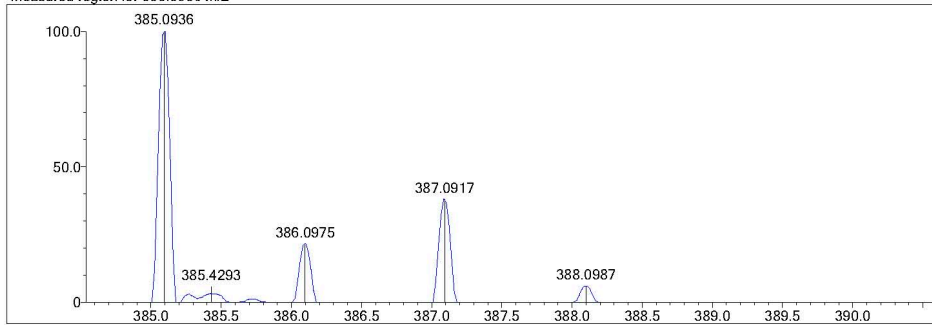

C18 H19 N2 O4 Cl [M+Na]+ : Predicted region for 385.0926 m/z

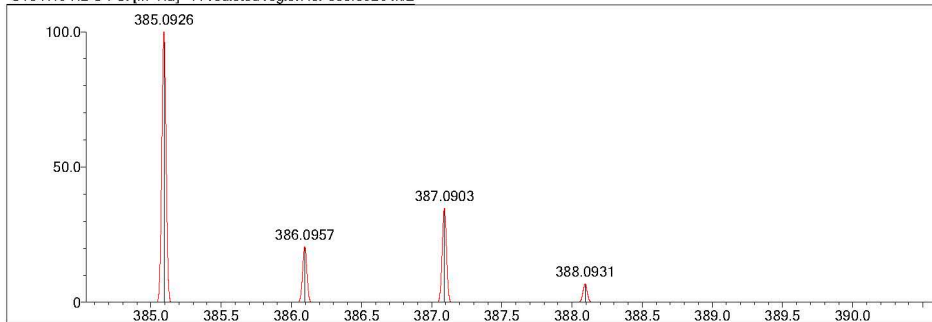

| Rank | Score | Formula (M)      | Ion     | Meas. m/z | Pred. m/z | Df. (mDa) | Df. (ppm) | Iso   | DBE  |
|------|-------|------------------|---------|-----------|-----------|-----------|-----------|-------|------|
| 2    | 83.09 | C18 H19 N2 O4 Cl | [M+Na]+ | 385.0936  | 385.0926  | 1.0       | 2.60      | 86.56 | 10.0 |

$^1\text{H}$  NMR (400 MHz, DMSO- $d_6$ ) of **8g**

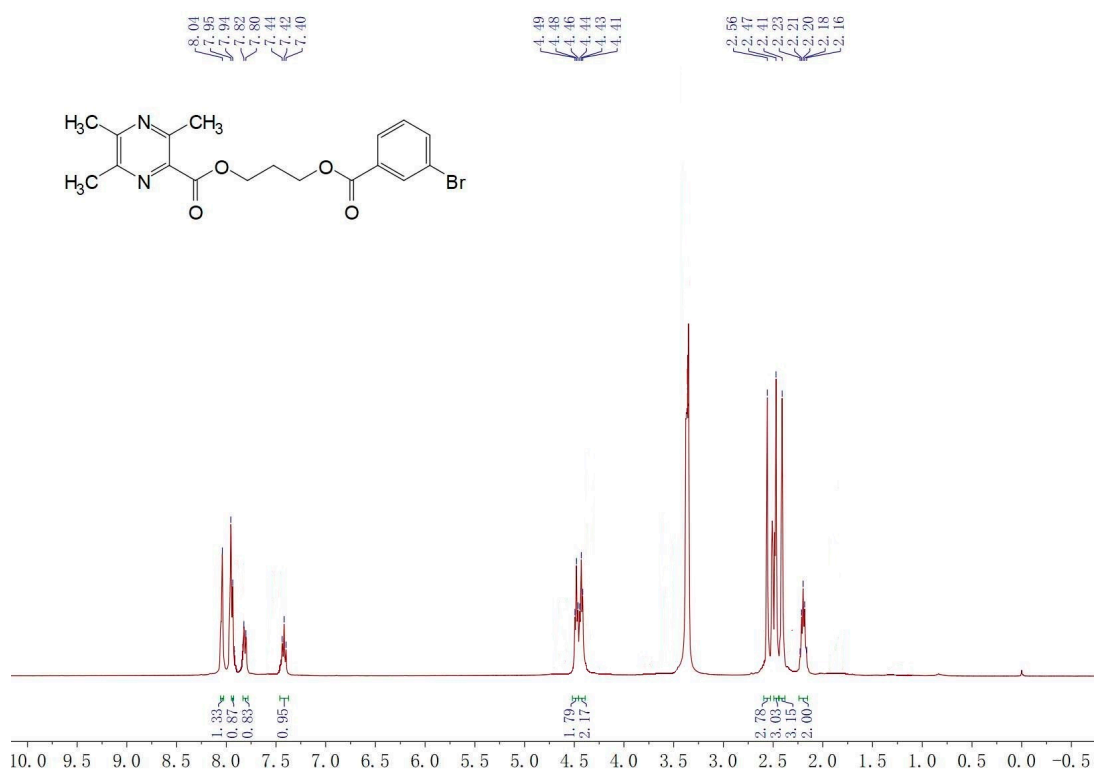

$^{13}\text{C}$  NMR (100 MHz, DMSO- $d_6$ ) of **8g**

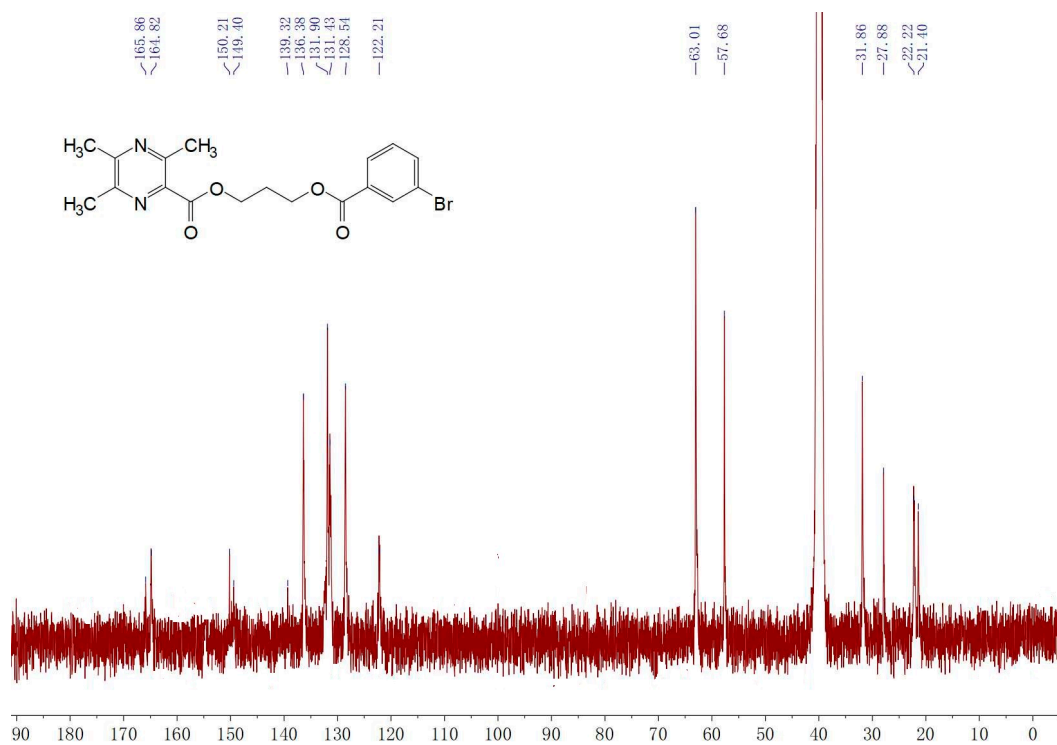

# HRMS spectra of 8g

Formula Predictor Report - 1.lcd

Page 1 of 1

Data File: I:\20170411-GY1.lcd

| Elmt | Val. | Min | Max | Elmt | Val. | Min | Max | Elmt | Val. | Min | Max | Elmt | Val. | Min | Max | Use Adduct |
|------|------|-----|-----|------|------|-----|-----|------|------|-----|-----|------|------|-----|-----|------------|
| H    | 1    | 0   | 60  | O    | 2    | 0   | 5   | P    | 3    | 0   | 0   | Cu   | 2    | 0   | 0   | H          |
| B    | 3    | 0   | 1   | 18O  | 2    | 0   | 0   | S    | 2    | 0   | 0   | Br   | 1    | 0   | 1   | Na         |
| C    | 4    | 0   | 50  | F    | 1    | 0   | 0   | Cl   | 1    | 0   | 0   | I    | 3    | 0   | 0   |            |
| N    | 3    | 0   | 5   | Si   | 4    | 0   | 0   | Ni   | 2    | 0   | 0   |      |      |     |     |            |

Error Margin (ppm): 100  
 HC Ratio: unlimited  
 Max Isotopes: all  
 MSn Iso RI (%): 75.00

DBE Range: -2.0 - 1000.0  
 Apply N Rule: yes  
 Isotope RI (%): 1.00  
 MSn Logic Mode: AND

Electron Ions: both  
 Use MSn Info: no  
 Isotope Res: 10000  
 Max Results: 500

Event#: 1 MS(E+) Ret. Time : 1.240 - 1.507 -> 1.793 Scan#: 187 - 227 -> 269

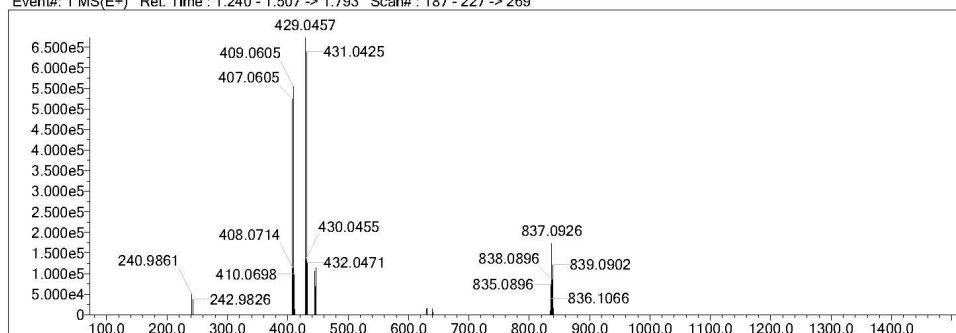

Measured region for 407.0605 m/z

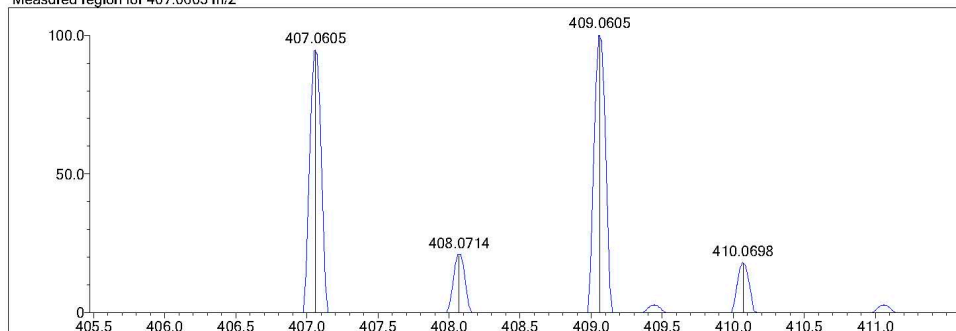

C18 H19 N2 O4 Br [M+H]+ : Predicted region for 407.0601 m/z

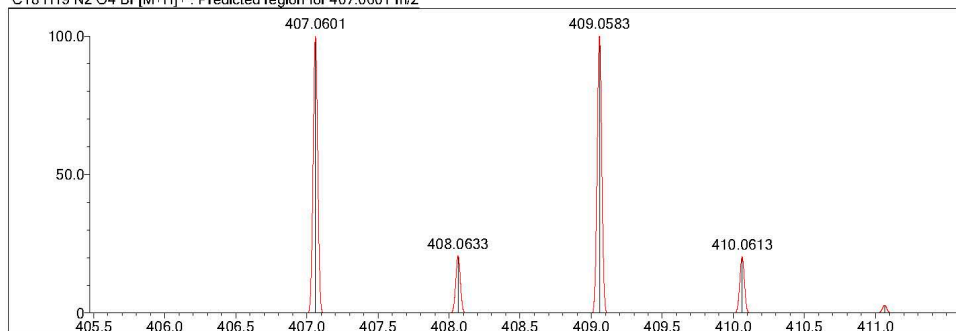

| Rank | Score | Formula (M)      | Ion    | Meas. m/z | Pred. m/z | Df. (mDa) | Df. (ppm) | Iso   | DBE  |
|------|-------|------------------|--------|-----------|-----------|-----------|-----------|-------|------|
| 2    | 72.39 | C18 H19 N2 O4 Br | [M+H]+ | 407.0605  | 407.0601  | 0.4       | 0.98      | 72.39 | 10.0 |

$^1\text{H}$  NMR (400 MHz, DMSO-d<sub>6</sub>) of **8h**

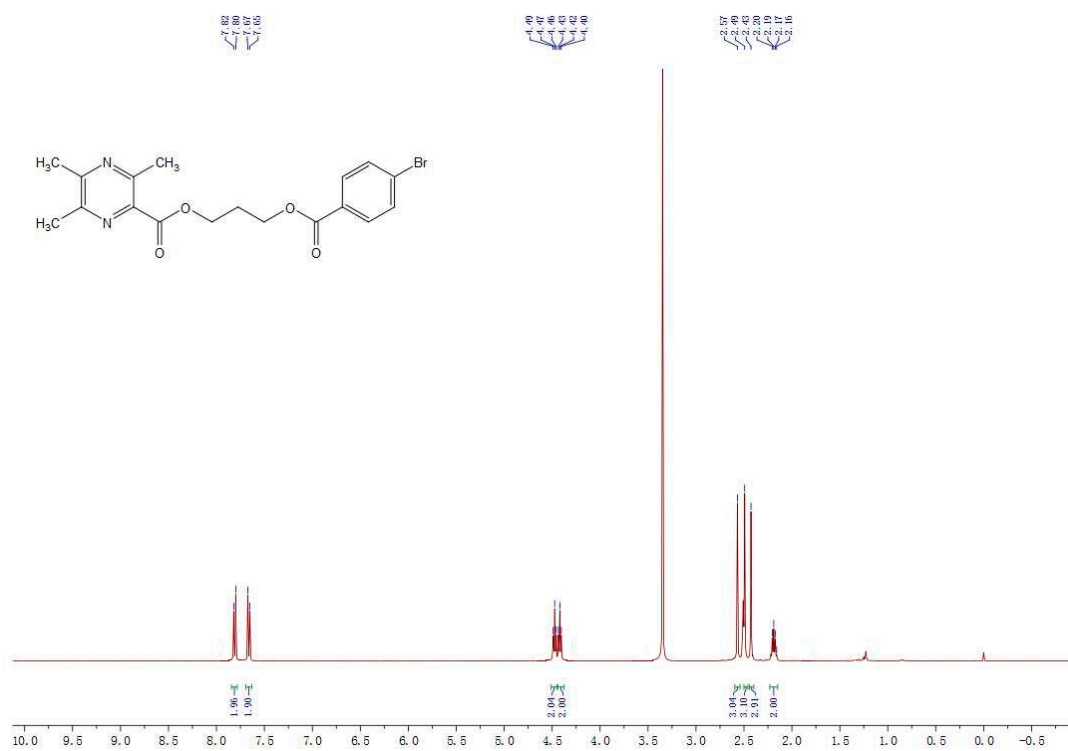

$^{13}\text{C}$  NMR (100 MHz, DMSO-d<sub>6</sub>) of **8h**

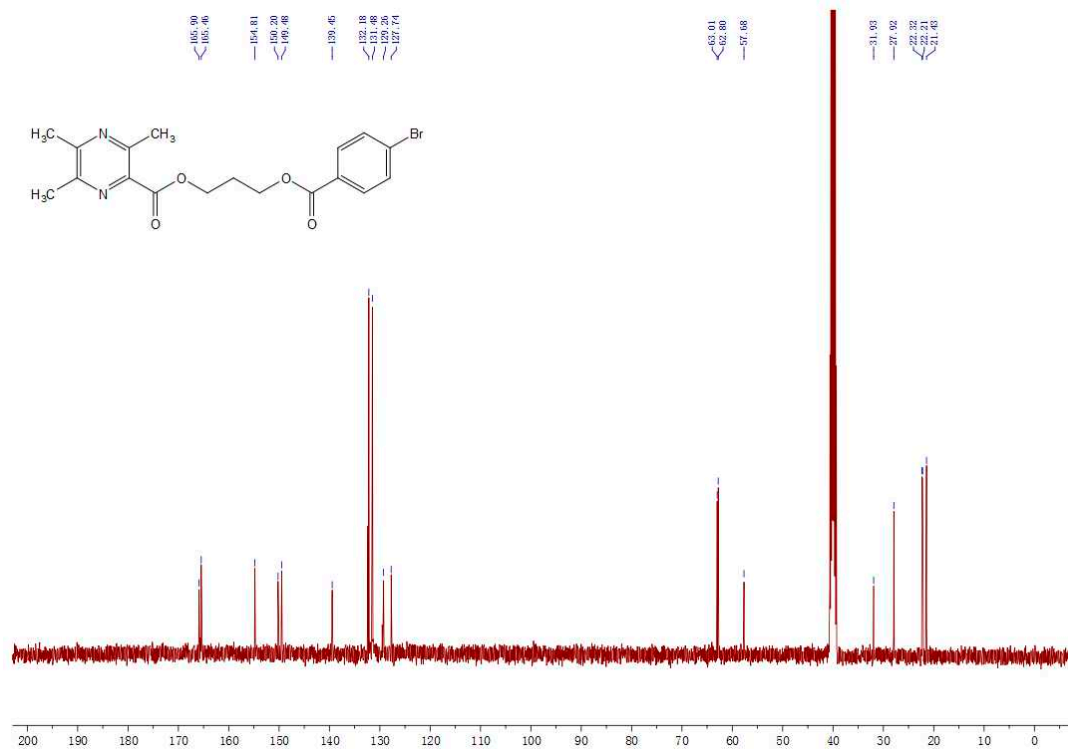

# HRMS spectra of 8h

Formula Predictor Report - 2.lcd

Page 1 of 1

Data File: I:\20170411-GY2.lcd

| Elmt | Val. | Min | Max | Elmt            | Val. | Min | Max | Elmt | Val. | Min | Max | Elmt | Val. | Min | Max | Use Adduct |
|------|------|-----|-----|-----------------|------|-----|-----|------|------|-----|-----|------|------|-----|-----|------------|
| H    | 1    | 0   | 60  | O               | 2    | 0   | 5   | P    | 3    | 0   | 0   | Cu   | 2    | 0   | 0   | H          |
| B    | 3    | 0   | 1   | <sup>18</sup> O | 2    | 0   | 0   | S    | 2    | 0   | 0   | Br   | 1    | 0   | 1   | Na         |
| C    | 4    | 0   | 50  | F               | 1    | 0   | 0   | Cl   | 1    | 0   | 0   | I    | 3    | 0   | 0   |            |
| N    | 3    | 0   | 5   | Si              | 4    | 0   | 0   | Ni   | 2    | 0   | 0   |      |      |     |     |            |

Error Margin (ppm): 100  
 HC Ratio: unlimited  
 Max Isotopes: all  
 MSn Iso RI (%): 75.00

DBE Range: -2.0 - 1000.0  
 Apply N Rule: yes  
 Isotope RI (%): 1.00  
 MSn Logic Mode: AND

Electron Ions: both  
 Use MSn Info: no  
 Isotope Res: 10000  
 Max Results: 500

Event#: 1 MS(E+) Ret. Time : 1.133 Scan#: 171

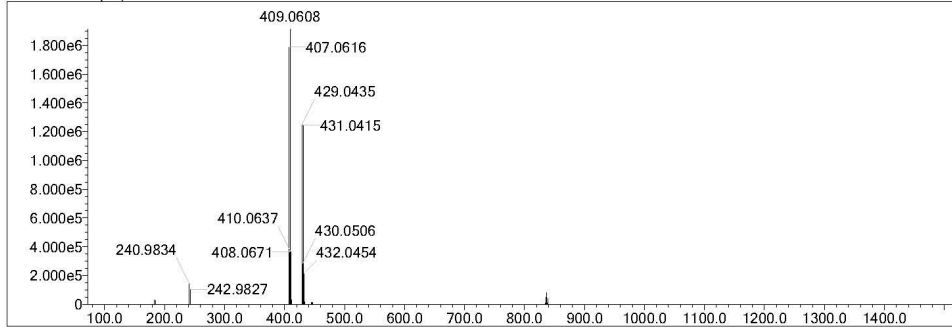

Measured region for 407.0616 m/z

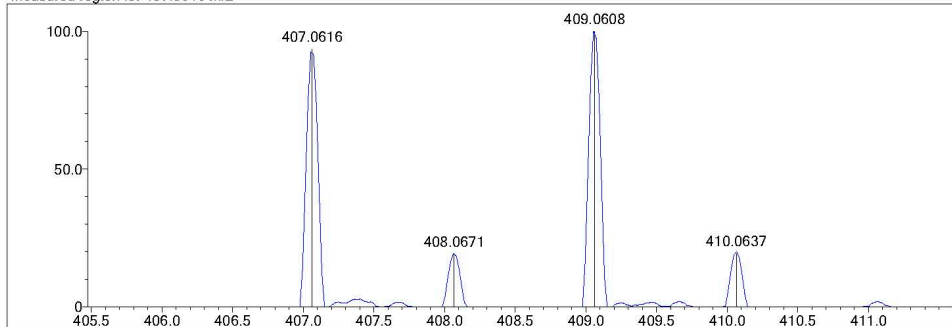

C18 H19 N2 O4 Br [M+H]<sup>+</sup> : Predicted region for 407.0601 m/z

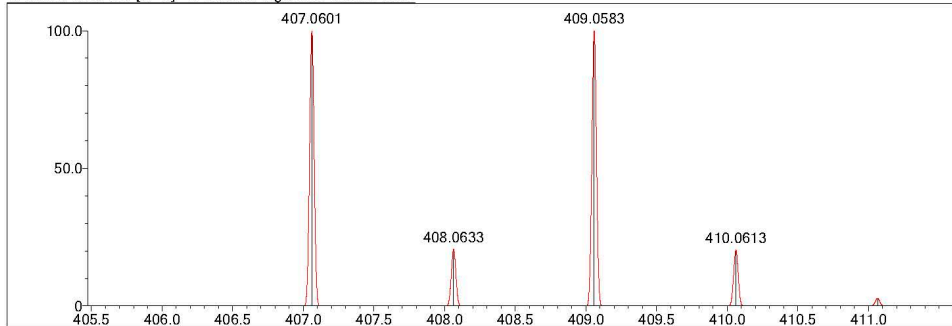

| Rank | Score | Formula (M)      | Ion                | Meas. m/z | Pred. m/z | Df. (mDa) | Df. (ppm) | Iso   | DBE  |
|------|-------|------------------|--------------------|-----------|-----------|-----------|-----------|-------|------|
| 2    | 68.13 | C18 H19 N2 O4 Br | [M+H] <sup>+</sup> | 407.0616  | 407.0601  | 1.5       | 3.68      | 73.02 | 10.0 |

$^1\text{H}$  NMR (400 MHz, DMSO- $d_6$ ) of **8i**

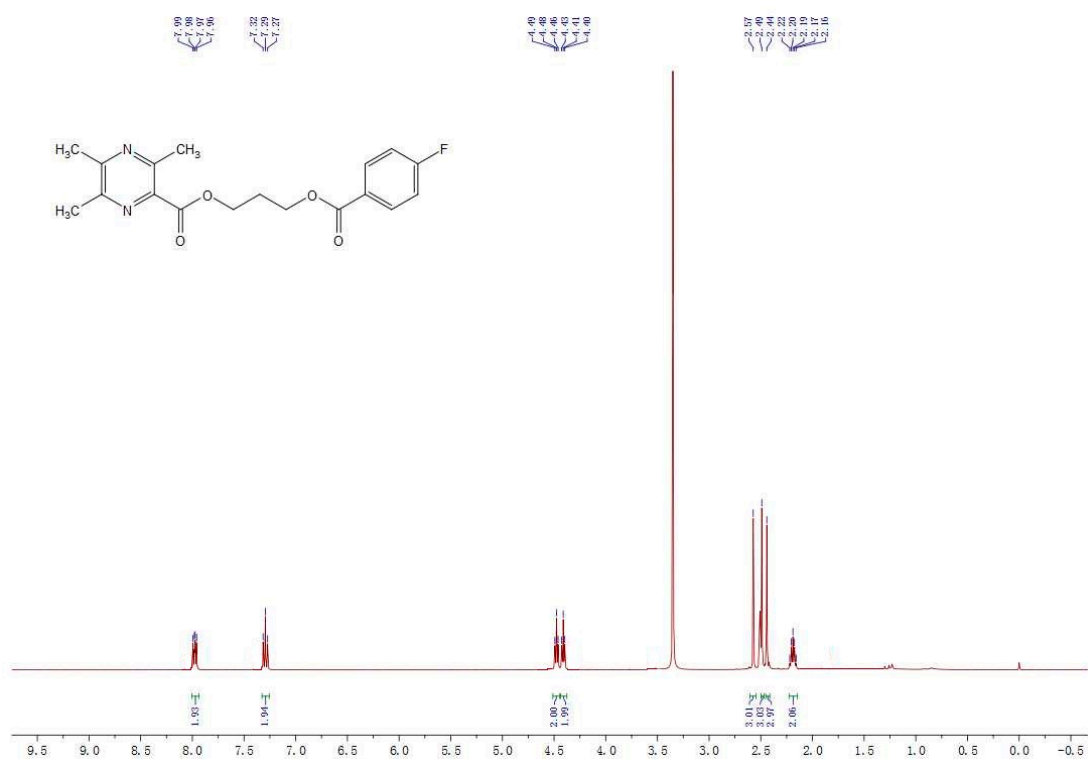

$^{13}\text{C}$  NMR (100 MHz, DMSO- $d_6$ ) of **8i**

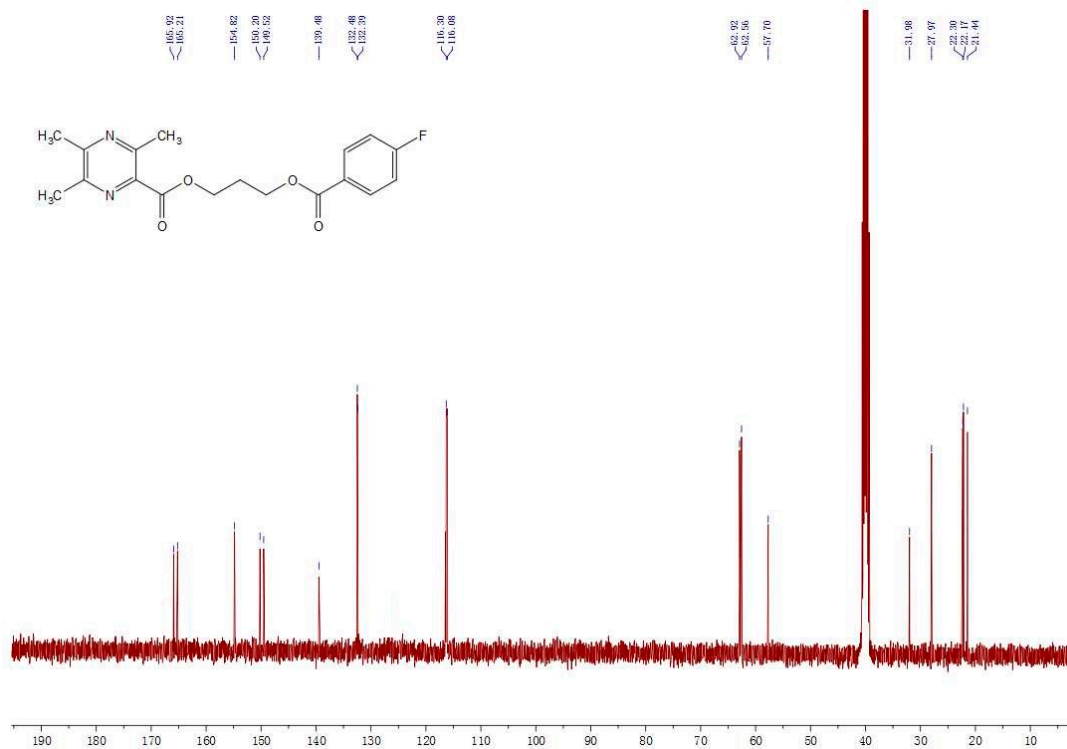

# HRMS spectra of 8i

Formula Predictor Report - 3.lcd

Page 1 of 1

Data File: I:\20170411-GY\3.lcd

| Elmt | Val. | Min | Max | Elmt | Val. | Min | Max | Elmt | Val. | Min | Max | Elmt | Val. | Min | Max | Use Adduct |
|------|------|-----|-----|------|------|-----|-----|------|------|-----|-----|------|------|-----|-----|------------|
| H    | 1    | 0   | 60  | O    | 2    | 0   | 5   | P    | 3    | 0   | 0   | Cu   | 2    | 0   | 0   | H          |
| B    | 3    | 0   | 0   | 18O  | 2    | 0   | 0   | S    | 2    | 0   | 0   | Br   | 1    | 0   | 1   | Na         |
| C    | 4    | 0   | 50  | F    | 1    | 0   | 1   | Cl   | 1    | 0   | 0   | I    | 3    | 0   | 0   |            |
| N    | 3    | 0   | 5   | Si   | 4    | 0   | 0   | Ni   | 2    | 0   | 0   |      |      |     |     |            |

Error Margin (ppm): 100  
 HC Ratio: unlimited  
 Max Isotopes: all  
 MSn Iso RI (%): 75.00

DBE Range: -2.0 - 1000.0  
 Apply N Rule: yes  
 Isotope RI (%): 1.00  
 MSn Logic Mode: AND

Electron Ions: both  
 Use MSn Info: no  
 Isotope Res: 10000  
 Max Results: 500

Event#: 1 MS(E+) Ret. Time: 1.013 - 1.227 -> 1.588 Scan#: 153 - 185 -> 239

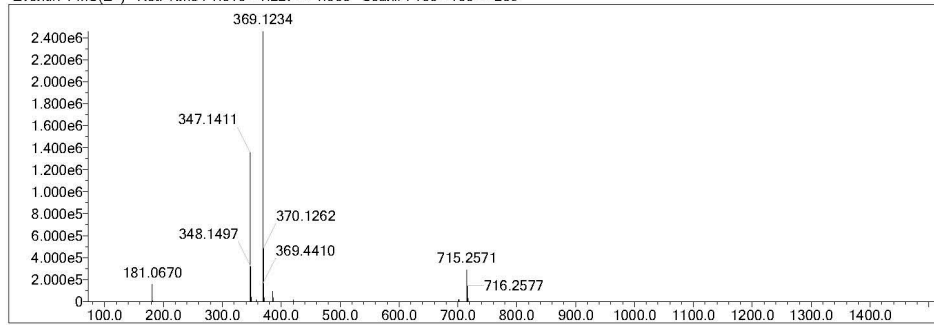

Measured region for 347.1411 m/z

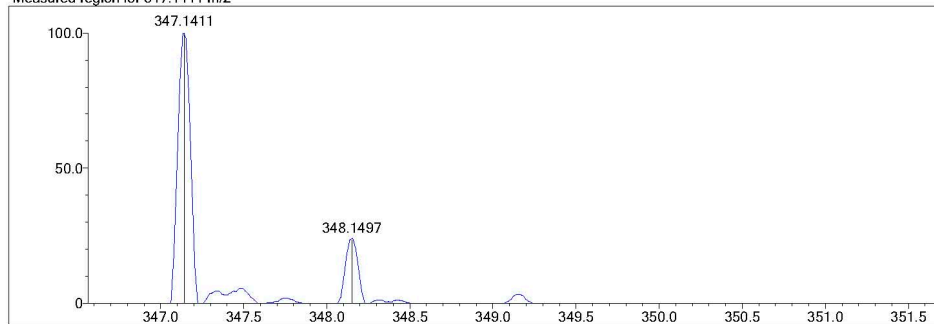

C18 H19 N2 O4 F [M+H]+ : Predicted region for 347.1402 m/z

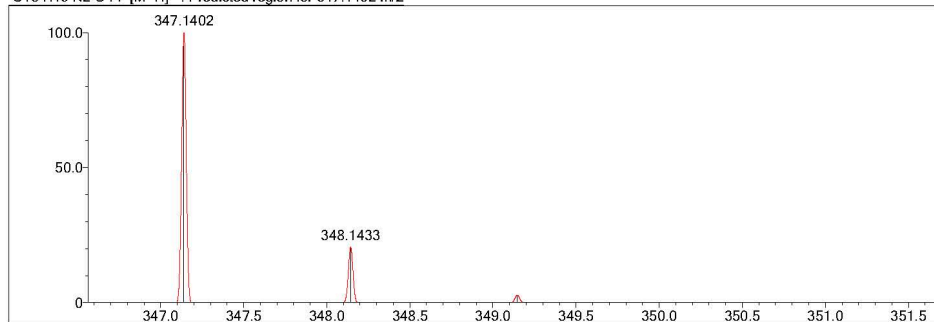

| Rank | Score | Formula (M)     | Ion    | Meas. m/z | Pred. m/z | Df. (mDa) | Df. (ppm) | Iso   | DBE  |
|------|-------|-----------------|--------|-----------|-----------|-----------|-----------|-------|------|
| 3    | 75.67 | C18 H19 N2 O4 F | [M+H]+ | 347.1411  | 347.1402  | 0.9       | 2.59      | 78.80 | 10.0 |

$^1\text{H}$  NMR (400 MHz, DMSO- $d_6$ ) of **8j**

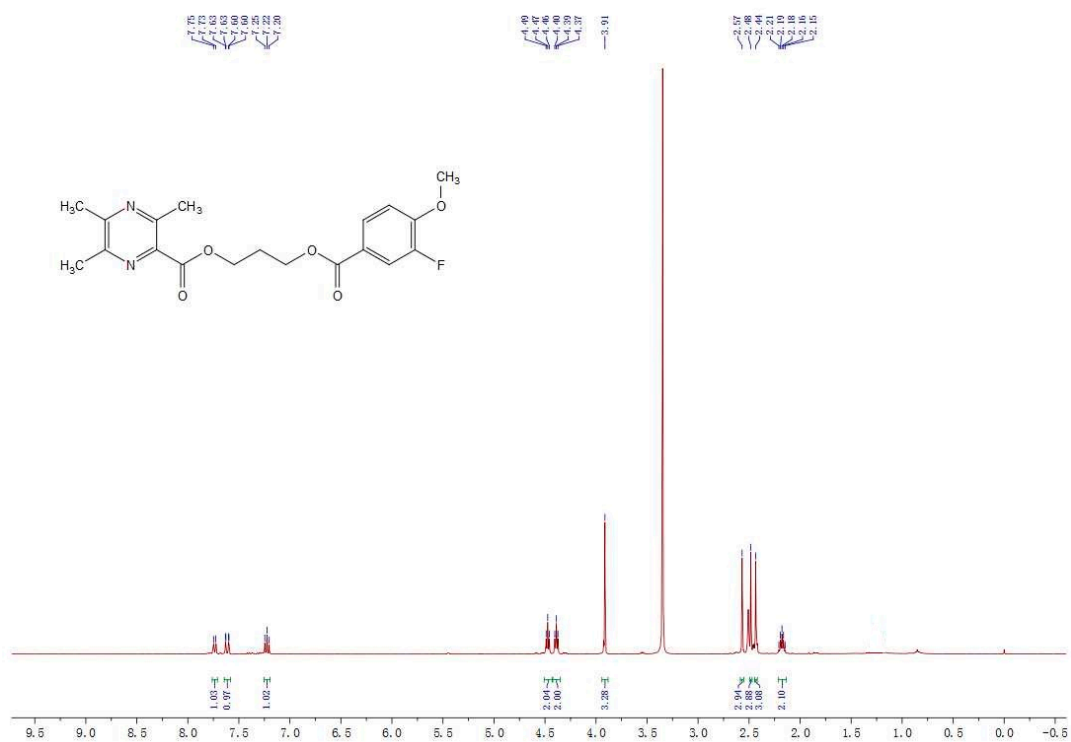

$^{13}\text{C}$  NMR (100 MHz, DMSO- $d_6$ ) of **8j**

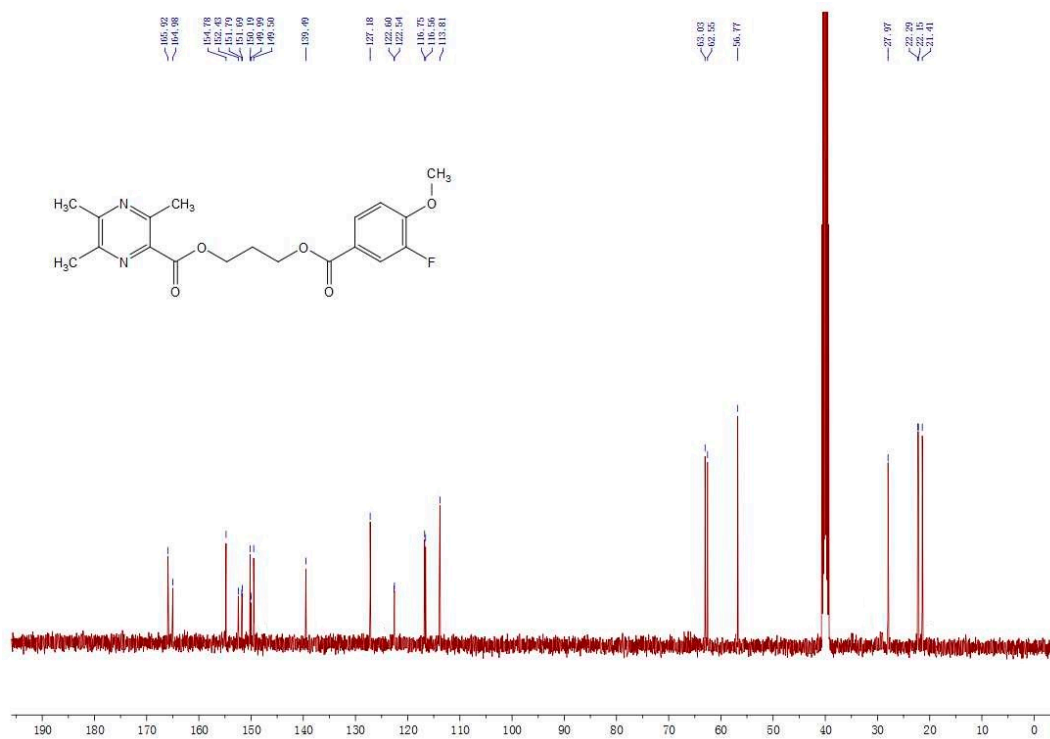



# HRMS spectra of 8j

Formula Predictor Report - 8.Icd

Page 1 of 1

Data File: I:\20170411-GY&8.Icd

| Elmt | Val. | Min | Max | Elmt | Val. | Min | Max | Elmt | Val. | Min | Max | Elmt | Val. | Min | Max | Use Adduct |
|------|------|-----|-----|------|------|-----|-----|------|------|-----|-----|------|------|-----|-----|------------|
| H    | 1    | 0   | 60  | O    | 2    | 0   | 6   | P    | 3    | 0   | 0   | Cu   | 2    | 0   | 0   | H          |
| B    | 3    | 0   | 0   | 18O  | 2    | 0   | 0   | S    | 2    | 0   | 0   | Br   | 1    | 0   | 1   | Na         |
| C    | 4    | 0   | 50  | F    | 1    | 0   | 1   | Cl   | 1    | 0   | 0   | I    | 3    | 0   | 0   |            |
| N    | 3    | 0   | 5   | Si   | 4    | 0   | 0   | Ni   | 2    | 0   | 0   |      |      |     |     |            |

Error Margin (ppm): 20

HC Ratio: unlimited  
Max Isotopes: all  
MSn Iso RI (%): 75.00

DBE Range: -2.0 - 1000.0

Apply N Rule: yes  
Isotope RI (%): 1.00  
MSn Logic Mode: AND

Electron Ions: both

Use MSn Info: no  
Isotope Res: 10000  
Max Results: 500

Event#: 1 MS(E+) Ret. Time : 1.107 - 1.160 -> 1.375 Scan#: 167 - 175 -> 207

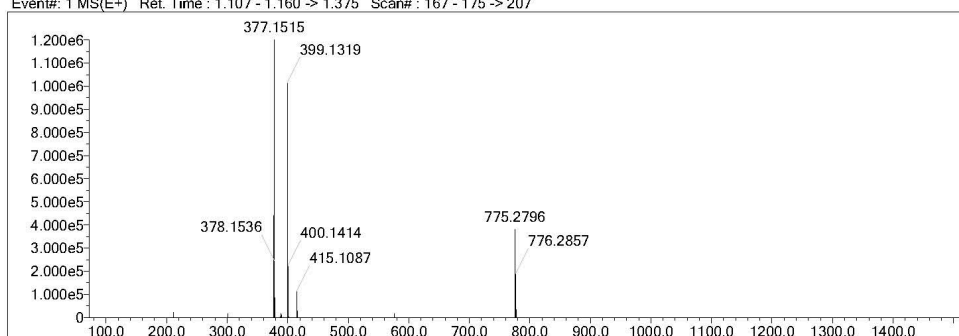

Measured region for 377.1515 m/z

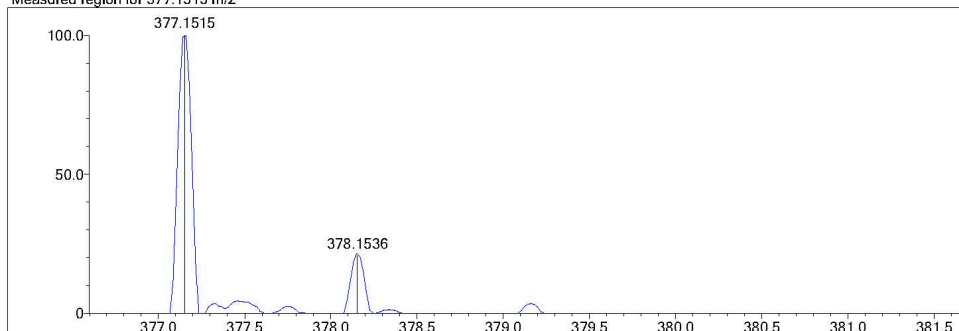

C19 H21 N2 O5 F [M+H]+ : Predicted region for 377.1507 m/z

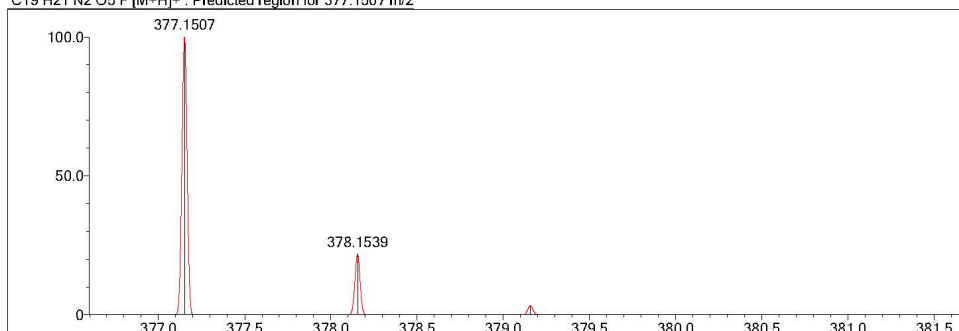

| Rank | Score | Formula (M)     | Ion    | Meas. m/z | Pred. m/z | Df. (mDa) | Df. (ppm) | Iso   | DBE  |
|------|-------|-----------------|--------|-----------|-----------|-----------|-----------|-------|------|
| 1    | 84.47 | C19 H21 N2 O5 F | [M+H]+ | 377.1515  | 377.1507  | 0.8       | 2.12      | 86.91 | 10.0 |

$^1\text{H}$  NMR (400 MHz, DMSO- $d_6$ ) of **8k**

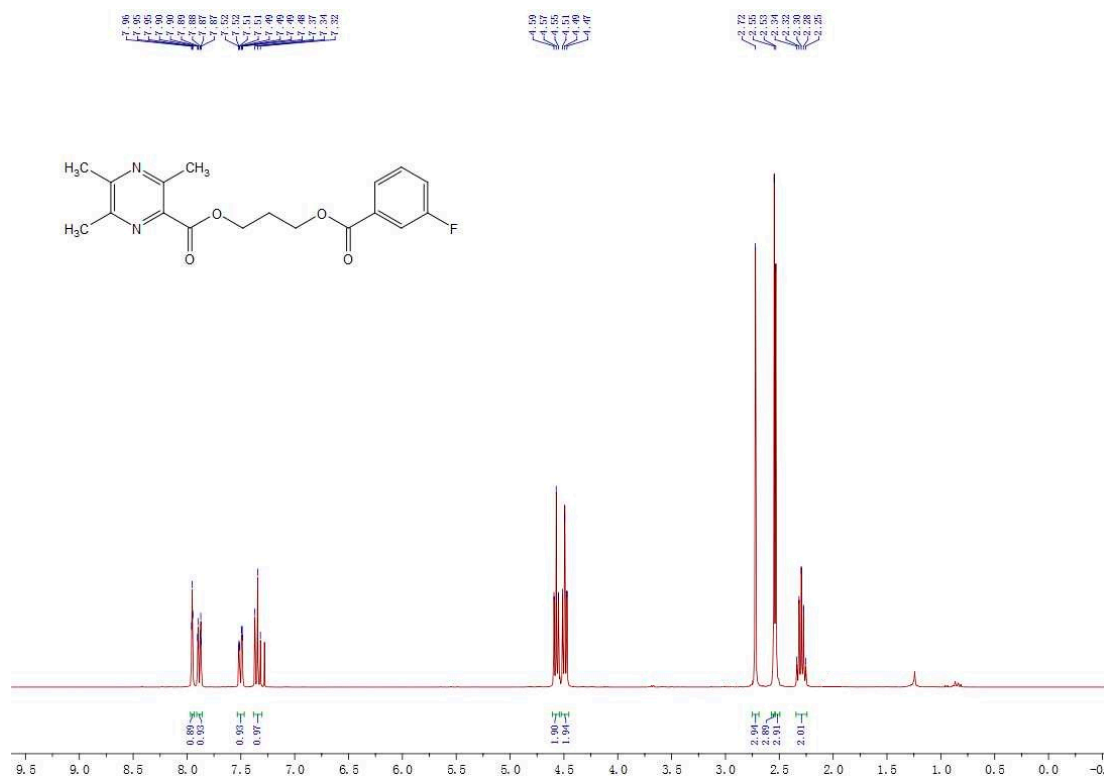

$^{13}\text{C}$  NMR (100 MHz, DMSO- $d_6$ ) of **8k**

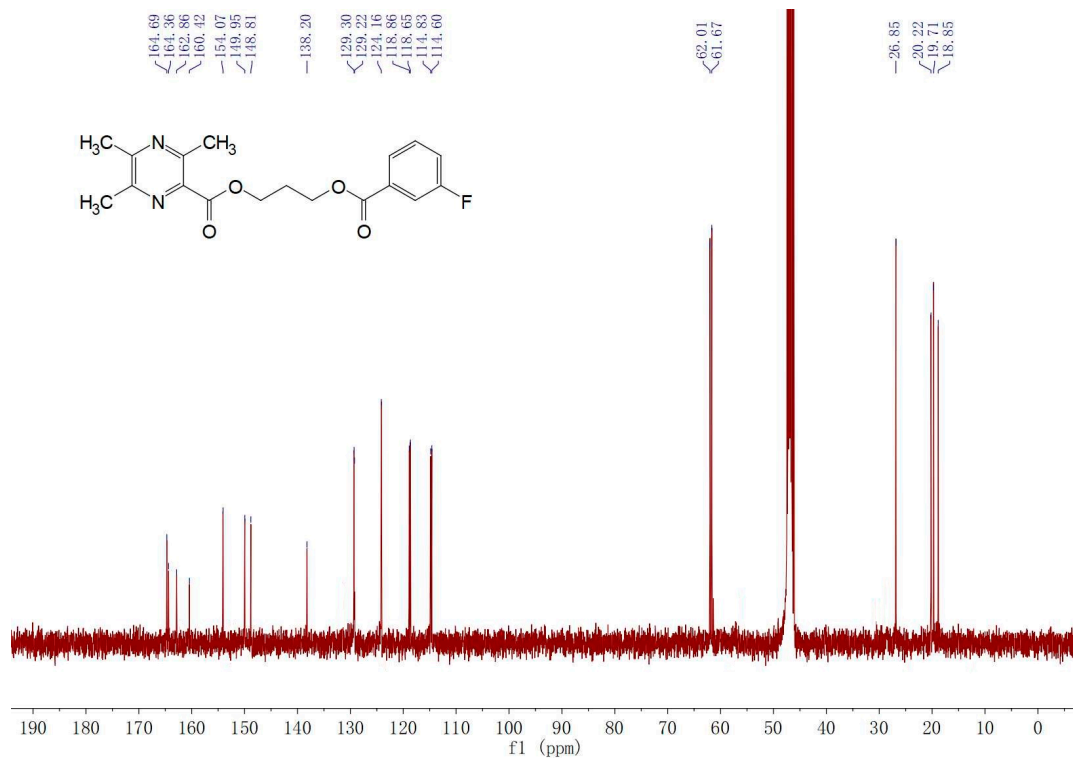

# HRMS spectra of 8k

Formula Predictor Report - 12.lcd

Page 1 of 1

Data File: I:\20170411-GY\12.lcd

| Elmt | Val. | Min | Max | Elmt | Val. | Min | Max | Elmt | Val. | Min | Max | Elmt | Val. | Min | Max | Use Adduct |
|------|------|-----|-----|------|------|-----|-----|------|------|-----|-----|------|------|-----|-----|------------|
| H    | 1    | 0   | 60  | O    | 2    | 0   | 6   | P    | 3    | 0   | 0   | Cu   | 2    | 0   | 0   | H          |
| B    | 3    | 0   | 0   | 18O  | 2    | 0   | 0   | S    | 2    | 0   | 0   | Br   | 1    | 0   | 1   | Na         |
| C    | 4    | 0   | 50  | F    | 1    | 0   | 1   | Cl   | 1    | 0   | 0   | I    | 3    | 0   | 0   |            |
| N    | 3    | 0   | 5   | Si   | 4    | 0   | 0   | Ni   | 2    | 0   | 0   |      |      |     |     |            |

Error Margin (ppm): 20

HC Ratio: unlimited

Max Isotopes: all

MSn Iso RI (%): 75.00

DBE Range: -2.0 - 1000.0

Apply N Rule: yes

Isotope RI (%): 1.00

MSn Logic Mode: AND

Electron Ions: both

Use MSn Info: no

Isotope Res: 10000

Max Results: 500

Event#: 1 MS(E+) Ret. Time : 1.080 Scan#: 163

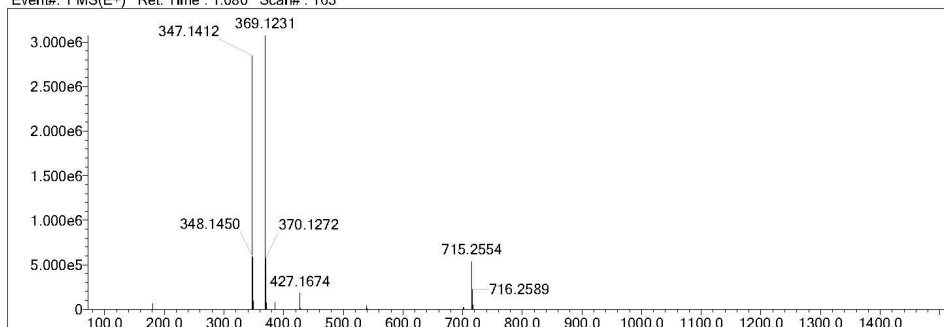

Measured region for 369.1231 m/z

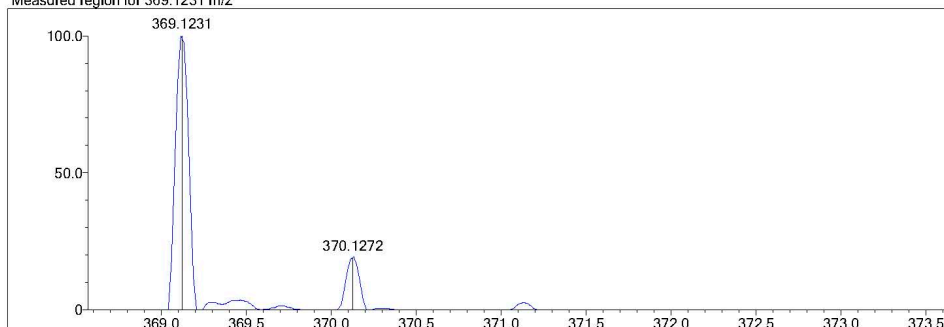

C18 H19 N2 O4 F [M+Na]+ : Predicted region for 369.1221 m/z

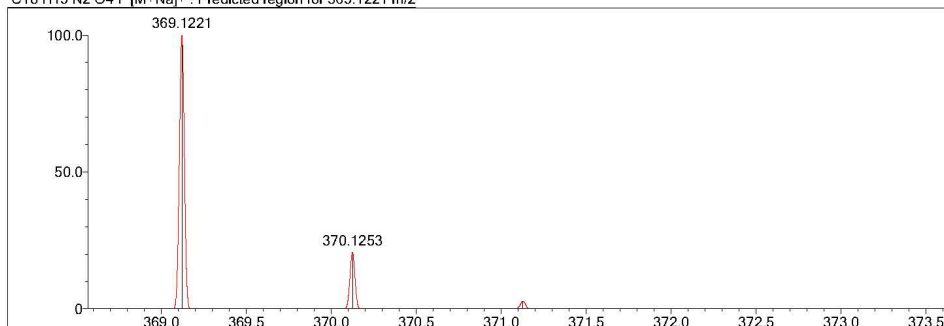

| Rank | Score | Formula (M)     | Ion     | Meas. m/z | Pred. m/z | Df. (mDa) | Df. (ppm) | Iso   | DBE  |
|------|-------|-----------------|---------|-----------|-----------|-----------|-----------|-------|------|
| 1    | 83.70 | C18 H19 N2 O4 F | [M+Na]+ | 369.1231  | 369.1221  | 1.0       | 2.71      | 87.43 | 10.0 |

$^1\text{H}$  NMR (300 MHz,  $\text{CDCl}_3$ ) of **81**

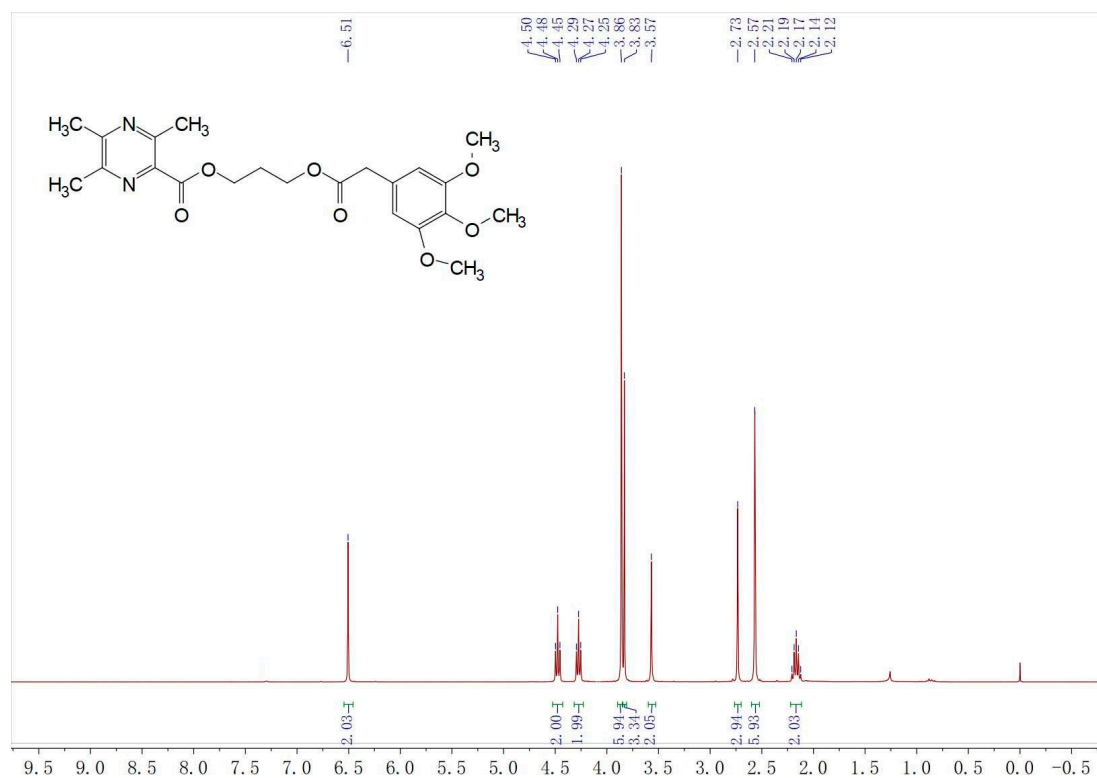

$^{13}\text{C}$  NMR (75 MHz,  $\text{CDCl}_3$ ) of **81**

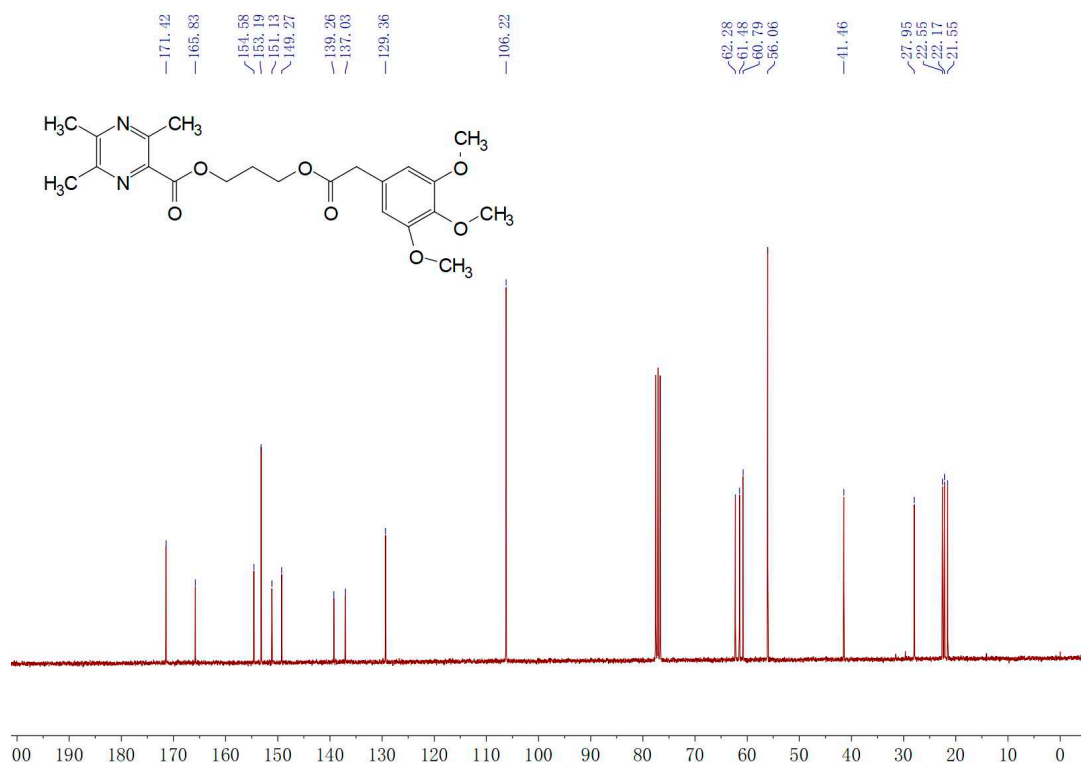

# HRMS spectra of 81

Formula Predictor Report - 19.Icd

Page 1 of 1

Data File: I:\20170411-GY19.Icd

| Elmt | Val. | Min | Max | Elmt | Val. | Min | Max | Elmt | Val. | Min | Max | Elmt | Val. | Min | Max | Use Adduct |
|------|------|-----|-----|------|------|-----|-----|------|------|-----|-----|------|------|-----|-----|------------|
| H    | 1    | 0   | 60  | O    | 2    | 0   | 7   | P    | 3    | 0   | 0   | Cu   | 2    | 0   | 0   | H          |
| B    | 3    | 0   | 0   | 18O  | 2    | 0   | 0   | S    | 2    | 0   | 0   | Br   | 1    | 0   | 1   | Na         |
| C    | 4    | 0   | 50  | F    | 1    | 0   | 1   | Cl   | 1    | 0   | 0   | I    | 3    | 0   | 0   |            |
| N    | 3    | 0   | 5   | Si   | 4    | 0   | 0   | Ni   | 2    | 0   | 0   |      |      |     |     |            |

Error Margin (ppm): 20  
 HC Ratio: unlimited  
 Max Isotopes: all  
 MSn Iso RI (%): 75.00

DBE Range: -2.0 - 1000.0  
 Apply N Rule: yes  
 Isotope RI (%): 1.00  
 MSn Logic Mode: AND

Electron Ions: both  
 Use MSn Info: no  
 Isotope Res: 10000  
 Max Results: 500

Event#: 1 MS(E+) Ret. Time : 1.147 - 1.187 -> 1.367 Scan#: 173 - 179 -> 205

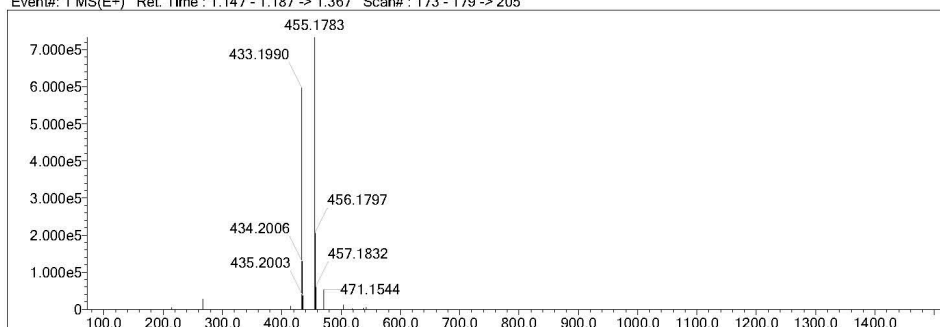

Measured region for 455.1783 m/z

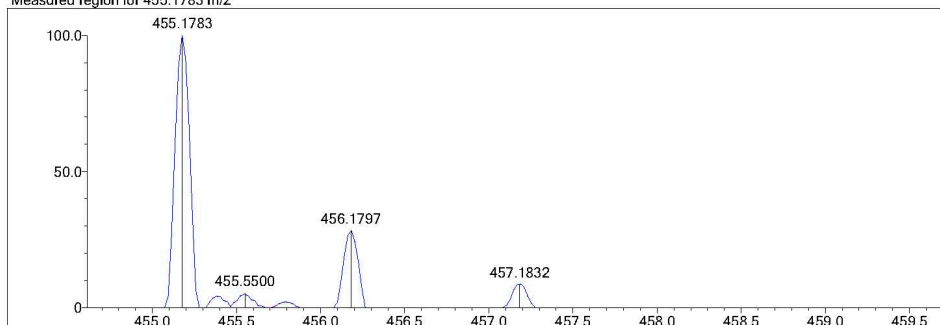

C22 H28 N2 O7 [M+Na]+ : Predicted region for 455.1789 m/z

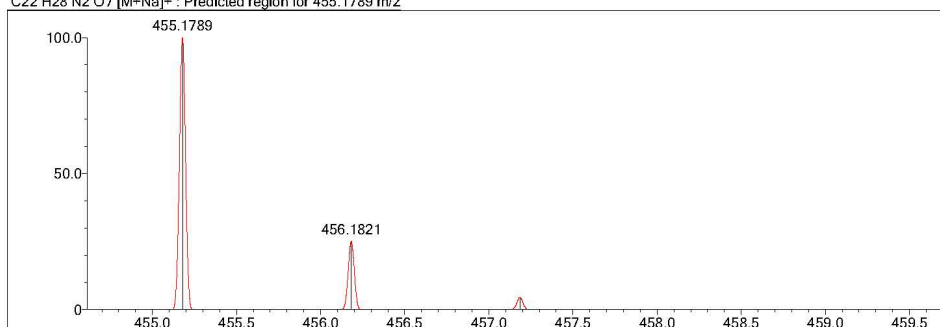

| Rank | Score | Formula (M)   | Ion     | Meas. m/z | Pred. m/z | Df. (mDa) | Df. (ppm) | Iso   | DBE  |
|------|-------|---------------|---------|-----------|-----------|-----------|-----------|-------|------|
| 3    | 69.47 | C22 H28 N2 O7 | [M+Na]+ | 455.1783  | 455.1789  | -0.6      | -1.32     | 70.03 | 10.0 |

$^1\text{H}$  NMR (400 MHz, DMSO- $d_6$ ) of **8m**

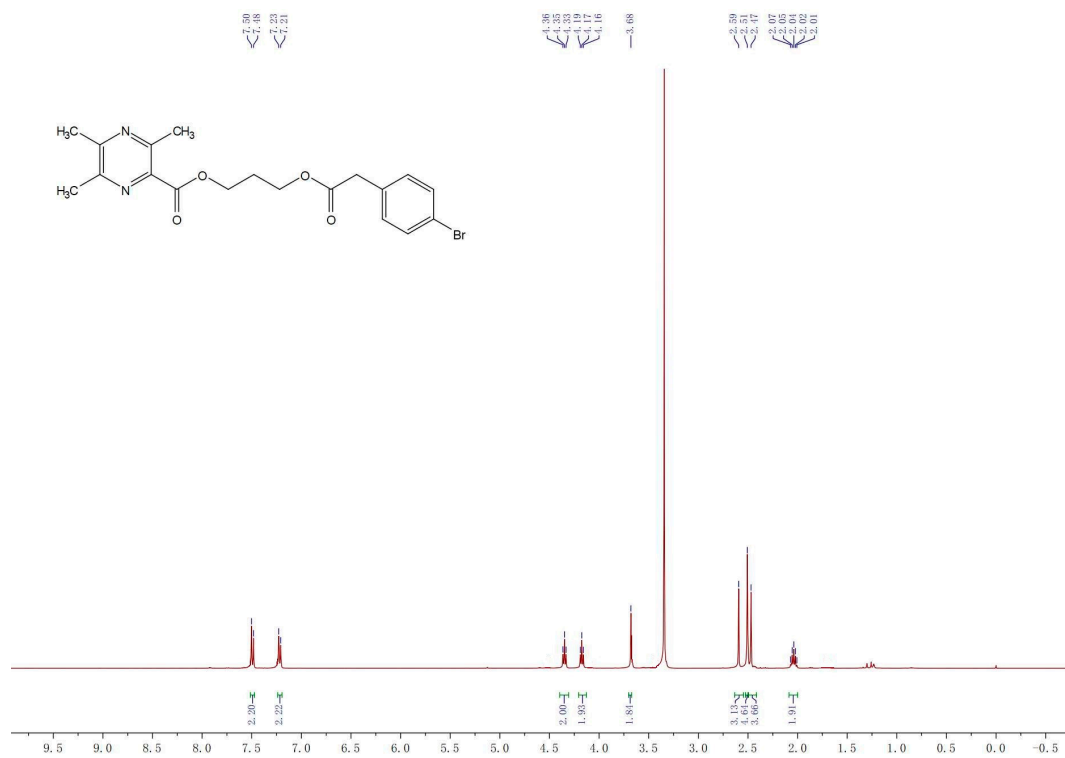

$^{13}\text{C}$  NMR (100 MHz, DMSO- $d_6$ ) of **8m**

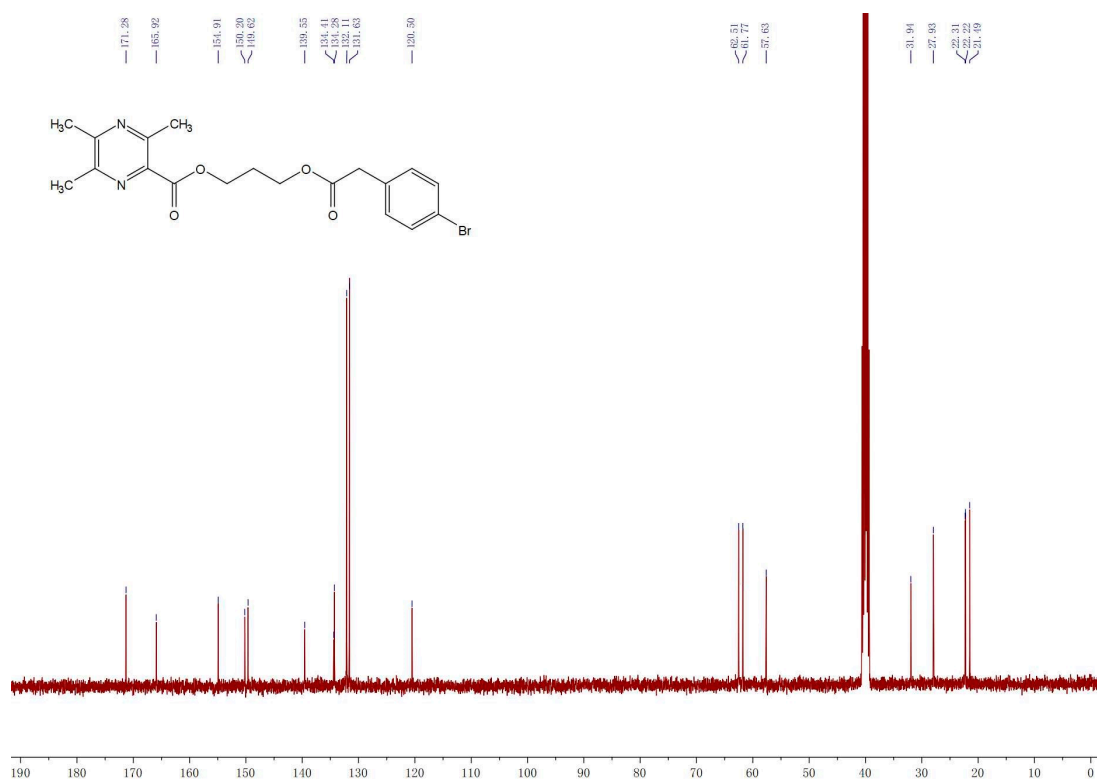

# HRMS spectra of 8m

Formula Predictor Report - 6.Icd

Page 1 of 1

Data File: I:\20170411-GY16.Icd

| Elmt | Val. | Min | Max | Elmt | Val. | Min | Max | Elmt | Val. | Min | Max | Elmt | Val. | Min | Max | Use Adduct |
|------|------|-----|-----|------|------|-----|-----|------|------|-----|-----|------|------|-----|-----|------------|
| H    | 1    | 0   | 60  | O    | 2    | 0   | 6   | P    | 3    | 0   | 0   | Cu   | 2    | 0   | 0   | H          |
| B    | 3    | 0   | 0   | 18O  | 2    | 0   | 0   | S    | 2    | 0   | 0   | Br   | 1    | 0   | 1   | Na         |
| C    | 4    | 0   | 50  | F    | 1    | 0   | 1   | Cl   | 1    | 0   | 0   | I    | 3    | 0   | 0   |            |
| N    | 3    | 0   | 5   | Si   | 4    | 0   | 0   | Ni   | 2    | 0   | 0   |      |      |     |     |            |

Error Margin (ppm): 20  
 HC Ratio: unlimited  
 Max Isotopes: all  
 MSn Iso RI (%): 75.00

DBE Range: -2.0 - 1000.0  
 Apply N Rule: yes  
 Isotope RI (%): 1.00  
 MSn Logic Mode: AND

Electron Ions: both  
 Use MSn Info: no  
 Isotope Res: 10000  
 Max Results: 500

Event#: 1 MS(E+) Ret. Time : 1.093 - 1.280 -> 1.636 Scan#: 165 - 193 -> 247

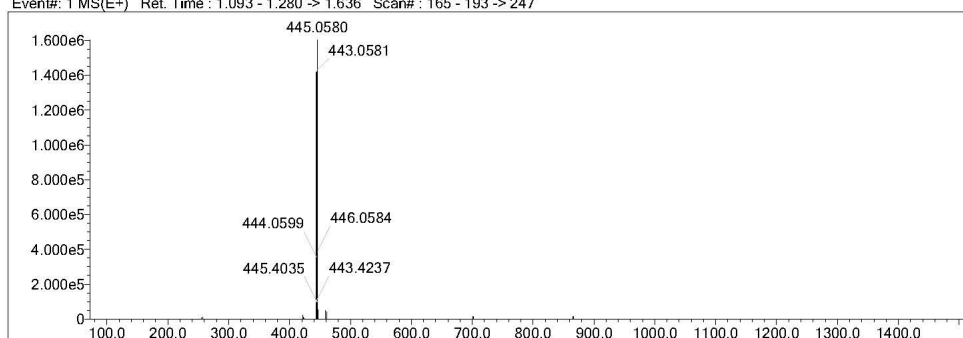

Measured region for 443.0581 m/z

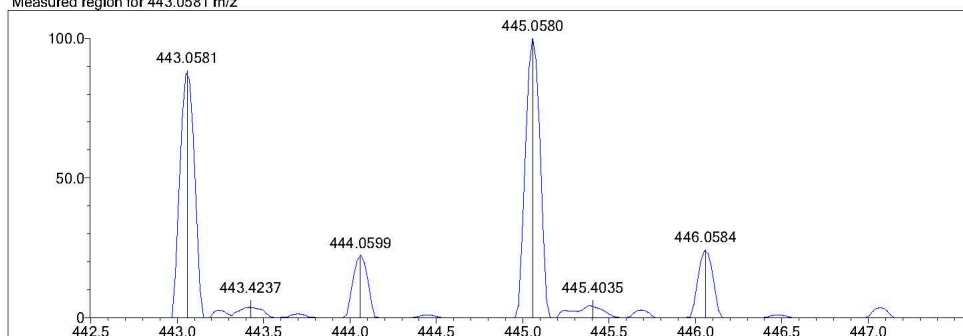

C19 H21 N2 O4 Br [M+Na]+ : Predicted region for 443.0577 m/z

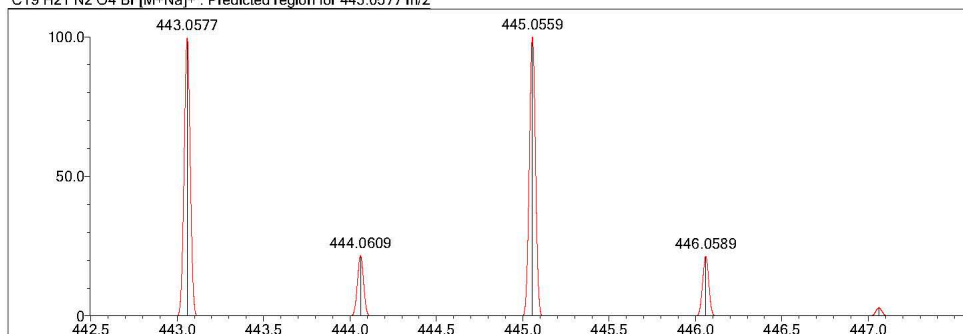

| Rank | Score | Formula (M)      | Ion     | Meas. m/z | Pred. m/z | Df. (mDa) | Df. (ppm) | Iso   | DBE  |
|------|-------|------------------|---------|-----------|-----------|-----------|-----------|-------|------|
| 1    | 72.18 | C19 H21 N2 O4 Br | [M+Na]+ | 443.0581  | 443.0577  | 0.4       | 0.90      | 72.18 | 10.0 |

### $^1\text{H}$ NMR (400 MHz, DMSO- $d_6$ ) of **8n**

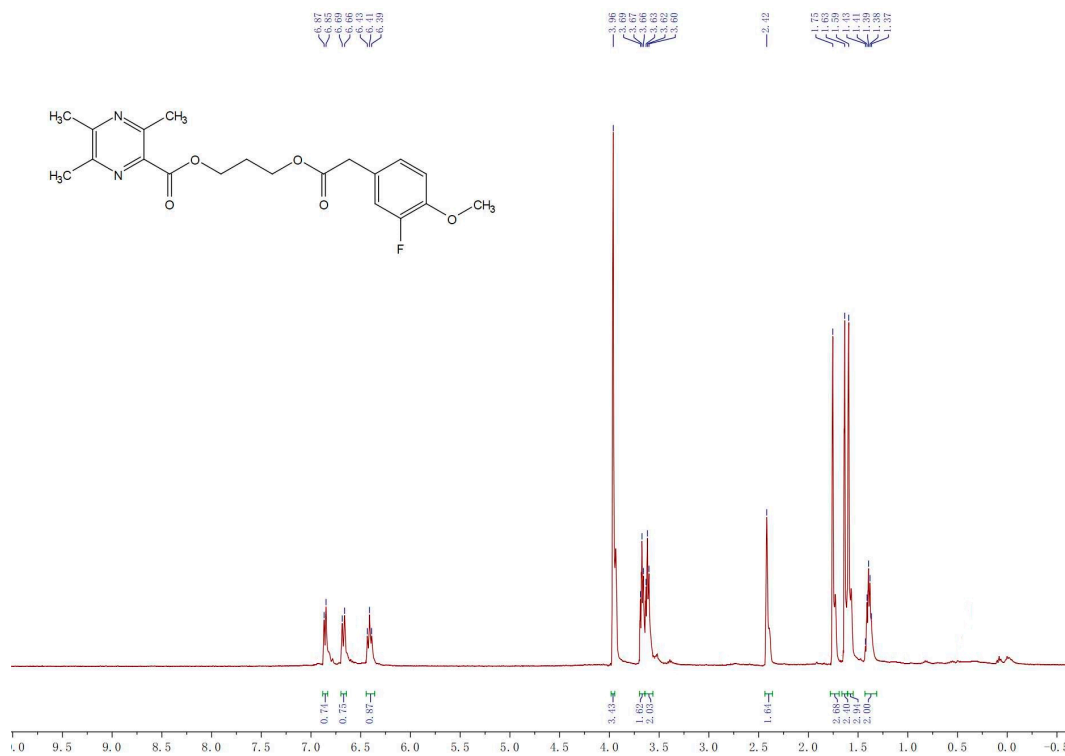

### $^{13}\text{C}$ NMR (100 MHz, DMSO- $d_6$ ) of **8n**

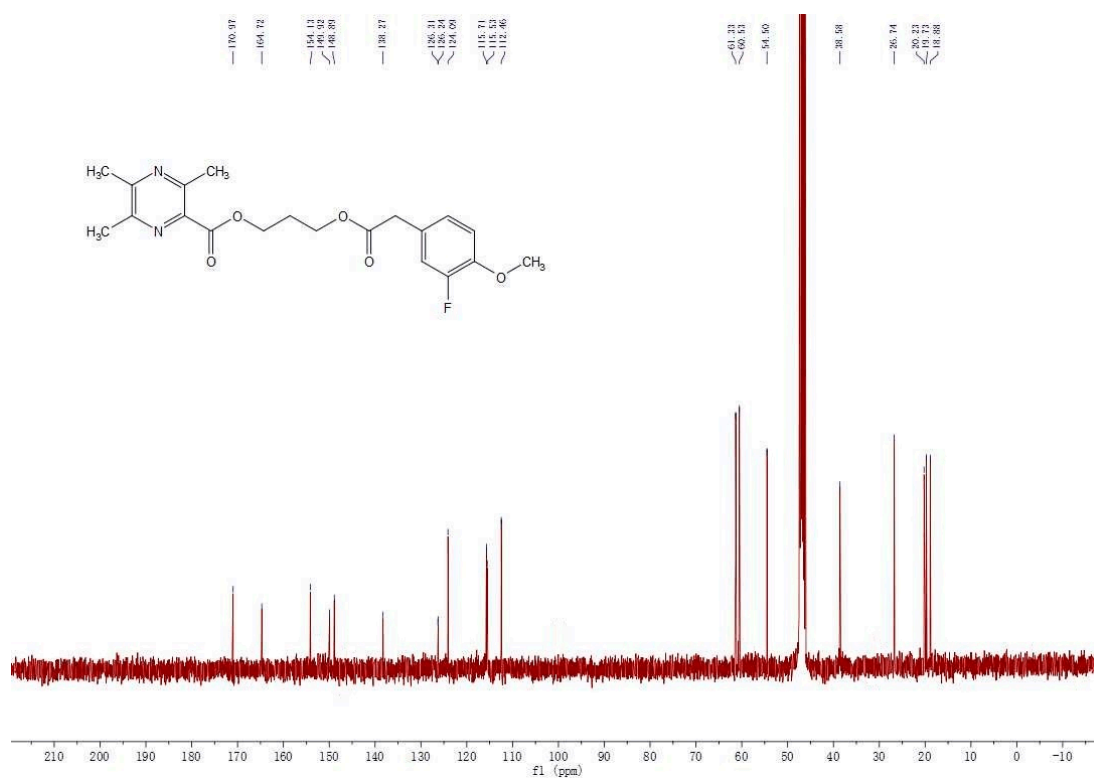



# HRMS spectra of 8n

Formula Predictor Report - 9.Icd

Page 1 of 1

Data File: I:\20170411-GY9.Icd

| Elmt | Val. | Min | Max | Elmt | Val. | Min | Max | Elmt | Val. | Min | Max | Elmt | Val. | Min | Max | Use Adduct |
|------|------|-----|-----|------|------|-----|-----|------|------|-----|-----|------|------|-----|-----|------------|
| H    | 1    | 0   | 60  | O    | 2    | 0   | 6   | P    | 3    | 0   | 0   | Cu   | 2    | 0   | 0   | H          |
| B    | 3    | 0   | 0   | 18O  | 2    | 0   | 0   | S    | 2    | 0   | 0   | Br   | 1    | 0   | 1   | Na         |
| C    | 4    | 0   | 50  | F    | 1    | 0   | 1   | Cl   | 1    | 0   | 0   | I    | 3    | 0   | 0   |            |
| N    | 3    | 0   | 5   | Si   | 4    | 0   | 0   | Ni   | 2    | 0   | 0   |      |      |     |     |            |

Error Margin (ppm): 20

HC Ratio: unlimited

Max Isotopes: all

MSn Iso RI (%): 75.00

DBE Range: -2.0 - 1000.0

Apply N Rule: yes

Isotope RI (%): 1.00

MSn Logic Mode: AND

Electron Ions: both

Use MSn Info: no

Isotope Res: 10000

Max Results: 500

Event#: 1 MS(E+) Ret. Time : 0.973 - 1.120 -> 1.278 Scan#: 147 - 169 -> 193

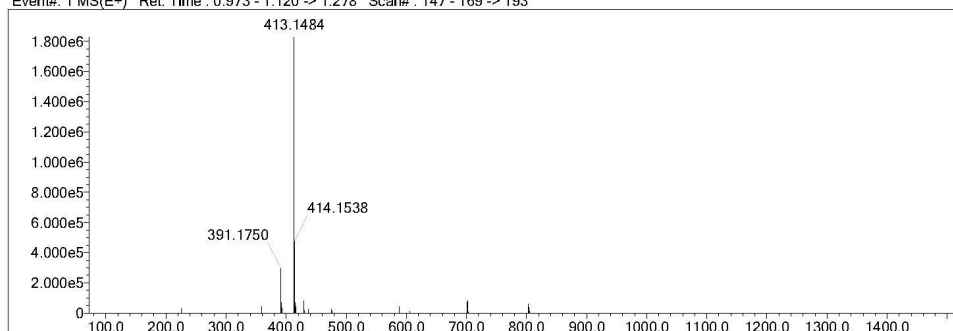

Measured region for 413.1484 m/z

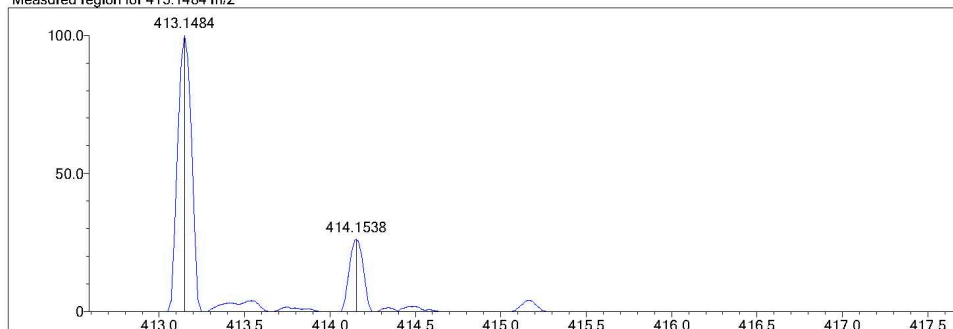

C20 H23 N2 O5 F [M+Na]+ : Predicted region for 413.1483 m/z

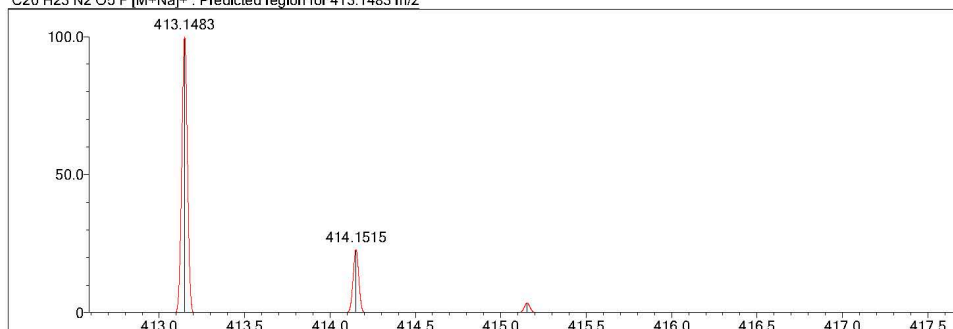

| Rank | Score | Formula (M)     | Ion     | Meas. m/z | Pred. m/z | Df. (mDa) | Df. (ppm) | Iso   | DBE  |
|------|-------|-----------------|---------|-----------|-----------|-----------|-----------|-------|------|
| 1    | 87.00 | C20 H23 N2 O5 F | [M+Na]+ | 413.1484  | 413.1483  | 0.1       | 0.24      | 87.00 | 10.0 |

$^1\text{H}$  NMR (400 MHz, DMSO-d<sub>6</sub>) of **8o**

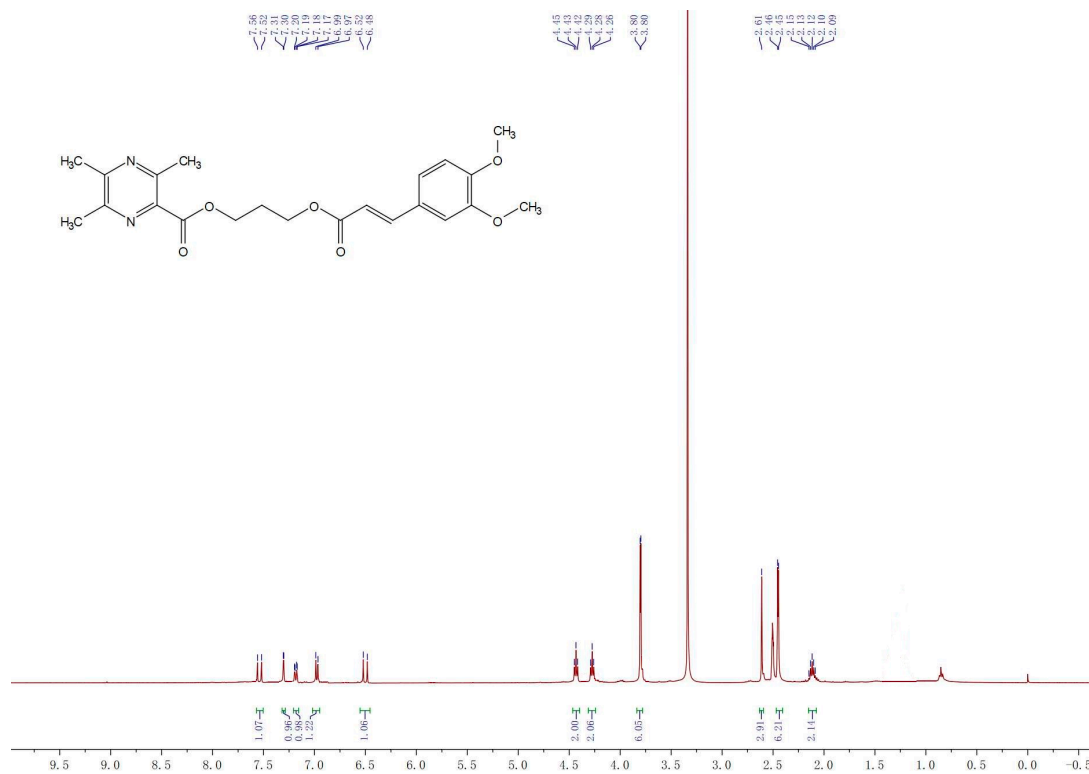

$^{13}\text{C}$  NMR (100 MHz, DMSO-d<sub>6</sub>) of **8o**

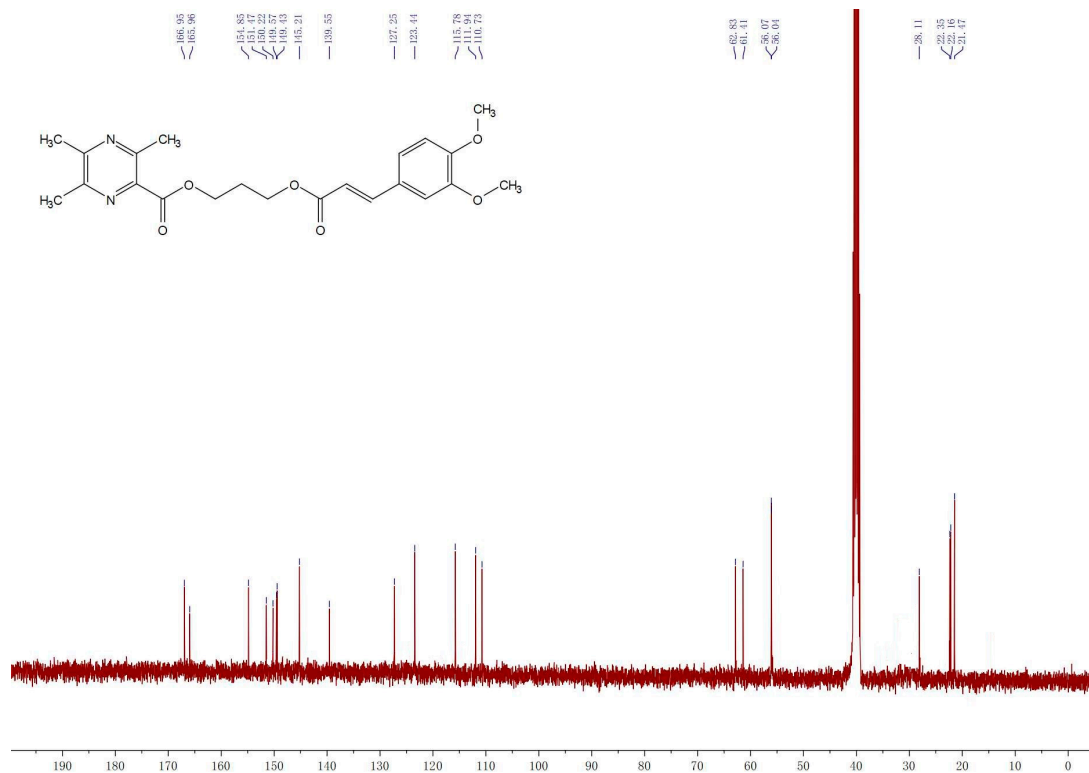

# HRMS spectra of 80

Formula Predictor Report - 18.lcd

Page 1 of 1

Data File: I:\20170411-GY18.lcd

| Elmt | Val. | Min | Max | Elmt | Val. | Min | Max | Elmt | Val. | Min | Max | Elmt | Val. | Min | Max | Use Adduct |
|------|------|-----|-----|------|------|-----|-----|------|------|-----|-----|------|------|-----|-----|------------|
| H    | 1    | 0   | 60  | O    | 2    | 0   | 7   | P    | 3    | 0   | 0   | Cu   | 2    | 0   | 0   | H          |
| B    | 3    | 0   | 0   | 18O  | 2    | 0   | 0   | S    | 2    | 0   | 0   | Br   | 1    | 0   | 1   | Na         |
| C    | 4    | 0   | 50  | F    | 1    | 0   | 1   | Cl   | 1    | 0   | 0   | I    | 3    | 0   | 0   |            |
| N    | 3    | 0   | 5   | Si   | 4    | 0   | 0   | Ni   | 2    | 0   | 0   |      |      |     |     |            |

Error Margin (ppm): 20

HC Ratio: unlimited  
Max Isotopes: all  
MSn Iso RI (%): 75.00

DBE Range: -2.0 - 1000.0

Apply N Rule: yes  
Isotope RI (%): 1.00  
MSn Logic Mode: AND

Electron Ions: both

Use MSn Info: no  
Isotope Res: 10000  
Max Results: 500

Event#: 1 MS(E+) Ret. Time : 1.187 - 1.227 -> 1.363 Scan#: 179 - 185 -> 205

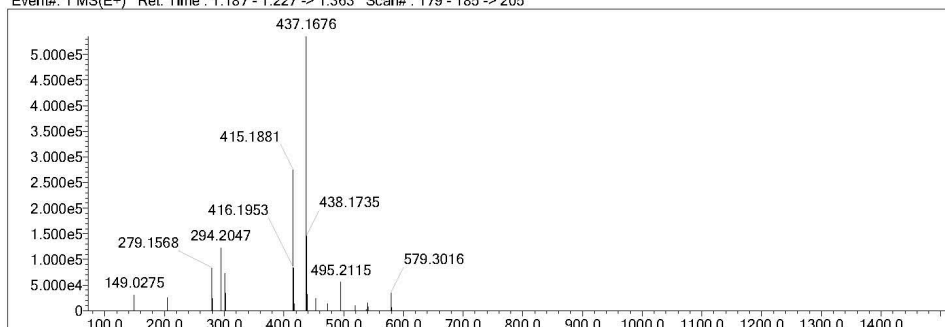

Measured region for 437.1676 m/z

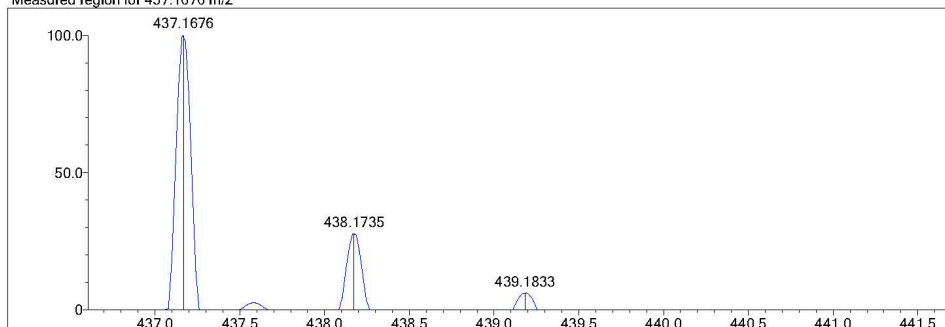

C22 H26 N2 O6 [M+Na]+ : Predicted region for 437.1683 m/z

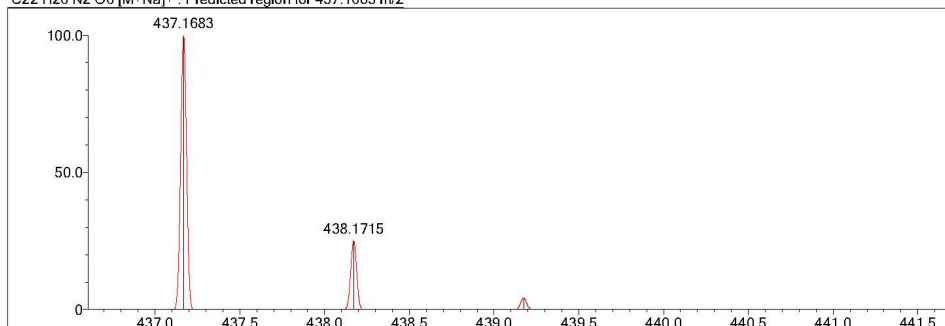

| Rank | Score | Formula (M)   | Ion     | Meas. m/z | Pred. m/z | Df. (mDa) | Df. (ppm) | Iso   | DBE  |
|------|-------|---------------|---------|-----------|-----------|-----------|-----------|-------|------|
| 1    | 80.52 | C22 H26 N2 O6 | [M+Na]+ | 437.1676  | 437.1683  | -0.7      | -1.60     | 81.75 | 11.0 |

$^1\text{H}$  NMR (400 MHz, DMSO- $d_6$ ) of **8p**

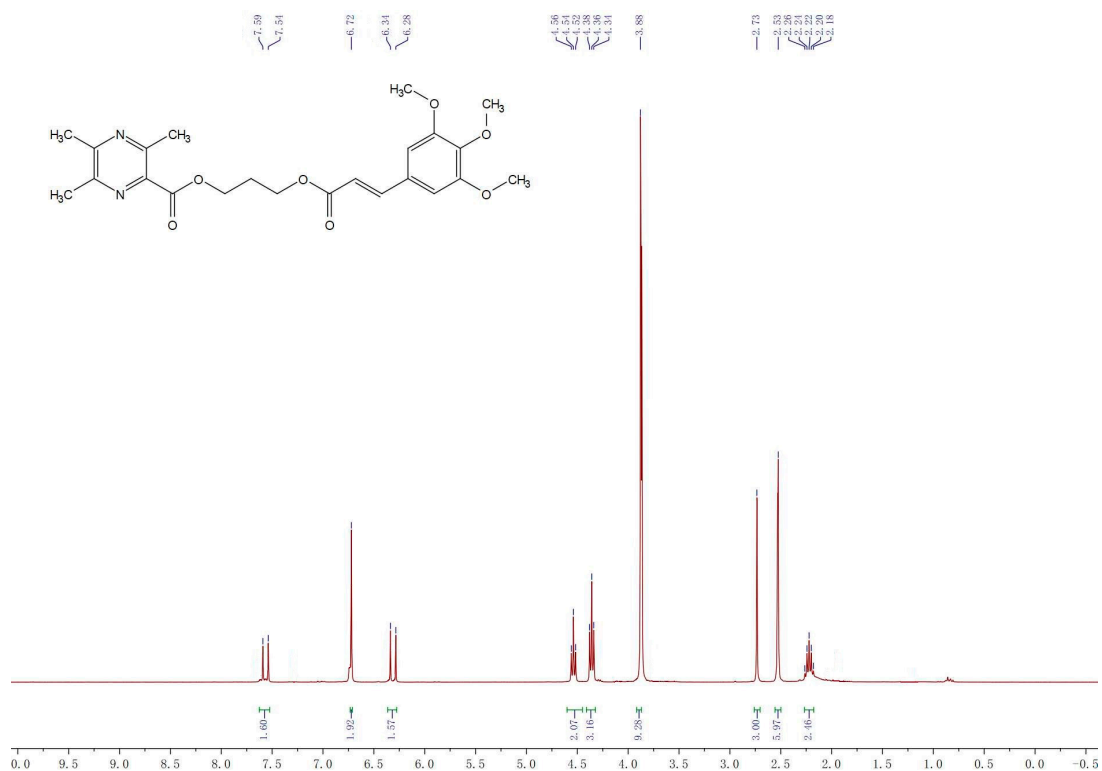

$^{13}\text{C}$  NMR (100 MHz, DMSO- $d_6$ ) of **8p**

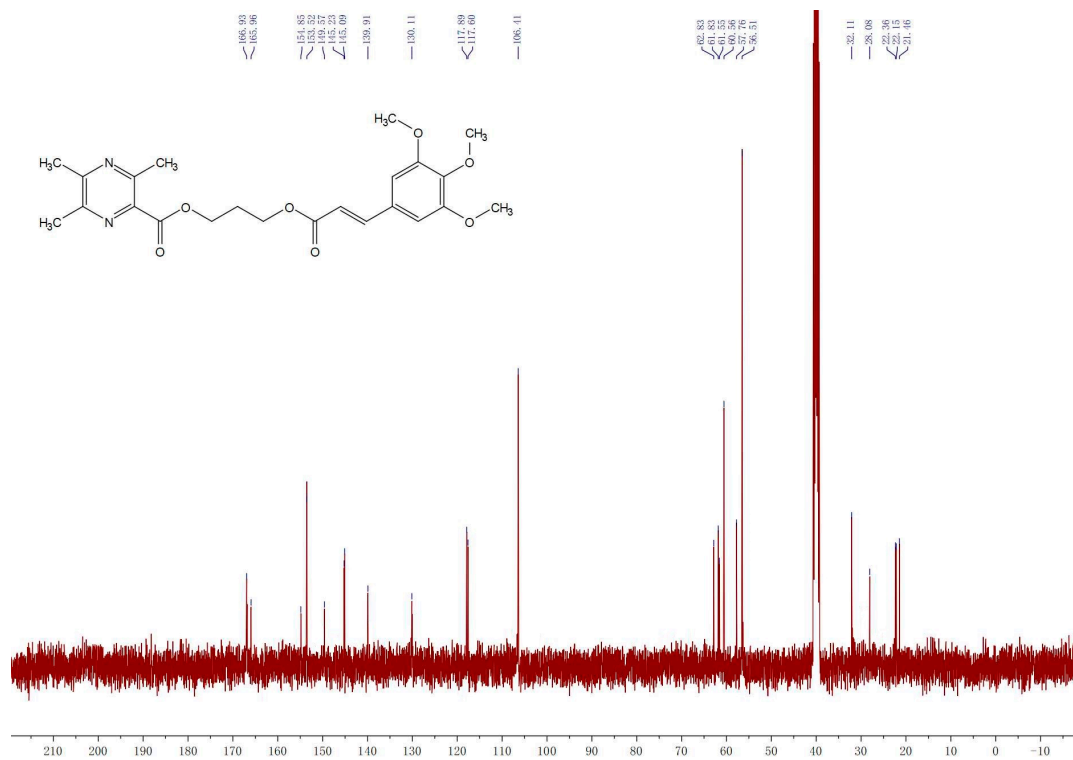

# HRMS spectra of 8p

Formula Predictor Report - 15.lcd

Page 1 of 1

Data File: I:\20170411-GY15.lcd

| Elmt | Val. | Min | Max | Elmt | Val. | Min | Max | Elmt | Val. | Min | Max | Elmt | Val. | Min | Max | Use Adduct |
|------|------|-----|-----|------|------|-----|-----|------|------|-----|-----|------|------|-----|-----|------------|
| H    | 1    | 0   | 60  | O    | 2    | 0   | 7   | P    | 3    | 0   | 0   | Cu   | 2    | 0   | 0   | H          |
| B    | 3    | 0   | 0   | 18O  | 2    | 0   | 0   | S    | 2    | 0   | 0   | Br   | 1    | 0   | 1   | Na         |
| C    | 4    | 0   | 50  | F    | 1    | 0   | 1   | Cl   | 1    | 0   | 0   | I    | 3    | 0   | 0   |            |
| N    | 3    | 0   | 5   | Si   | 4    | 0   | 0   | Ni   | 2    | 0   | 0   |      |      |     |     |            |

Error Margin (ppm): 20

HC Ratio: unlimited

Max Isotopes: all

MSn Iso RI (%): 75.00

DBE Range: -2.0 - 1000.0

Apply N Rule: yes

Isotope RI (%): 1.00

MSn Logic Mode: AND

Electron Ions: both

Use MSn Info: no

Isotope Res: 10000

Max Results: 500

Event#: 1 MS(E+) Ret. Time : 0.960 - 1.333 -> 1.551 Scan#: 145 - 201 -> 233

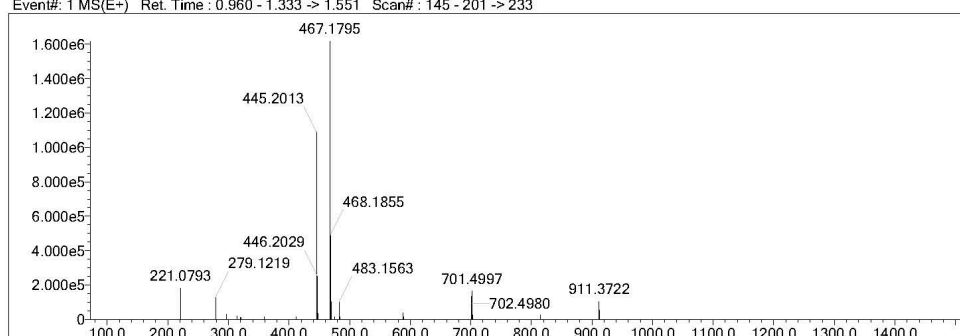

Measured region for 467.1795 m/z

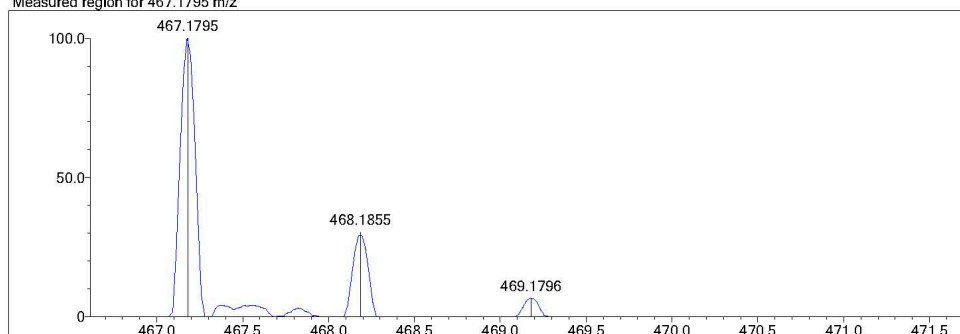

C23 H28 N2 O7 [M+Na]+ : Predicted region for 467.1789 m/z

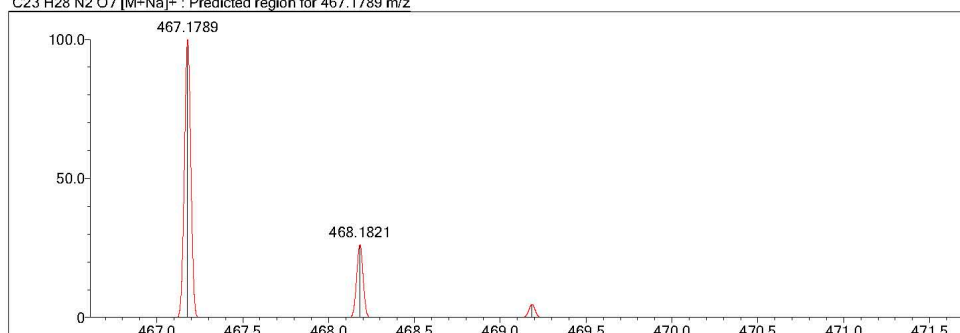

| Rank | Score | Formula (M)   | Ion     | Meas. m/z | Pred. m/z | Df. (mDa) | Df. (ppm) | Iso   | DBE  |
|------|-------|---------------|---------|-----------|-----------|-----------|-----------|-------|------|
| 1    | 84.11 | C23 H28 N2 O7 | [M+Na]+ | 467.1795  | 467.1789  | 0.6       | 1.28      | 84.70 | 11.0 |

$^1\text{H}$  NMR (300 MHz,  $\text{CDCl}_3$ ) of **8q**

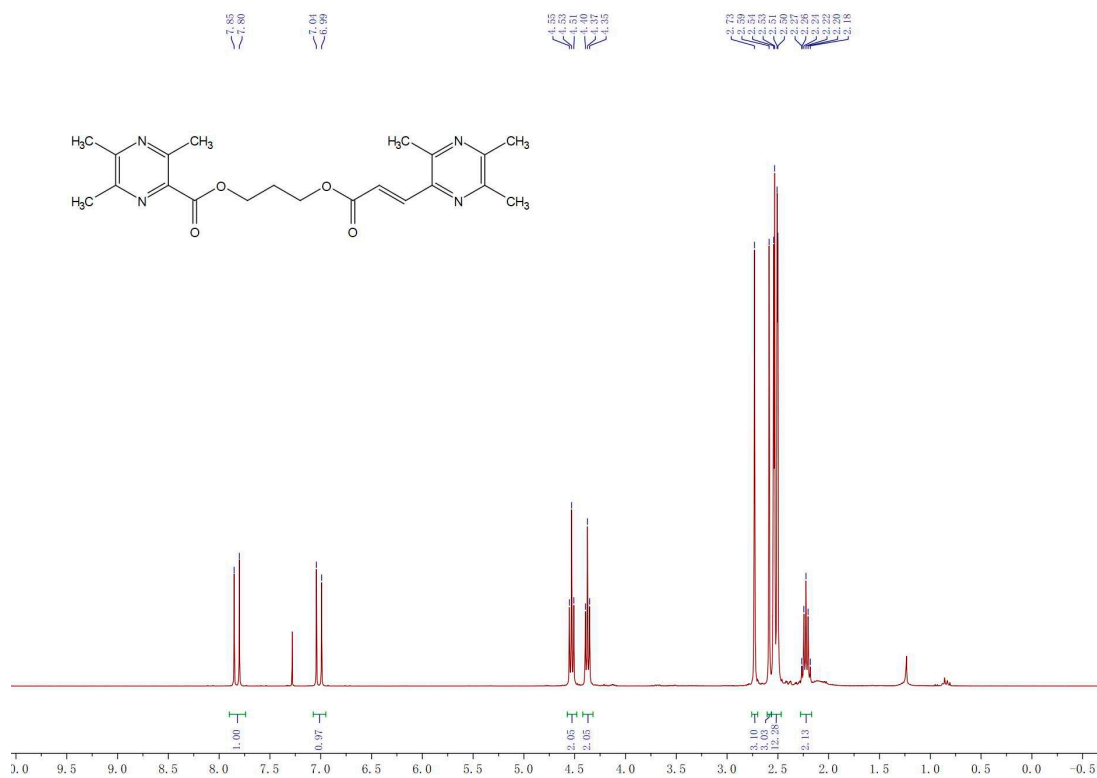

$^{13}\text{C}$  NMR (75 MHz,  $\text{CDCl}_3$ ) of **8q**

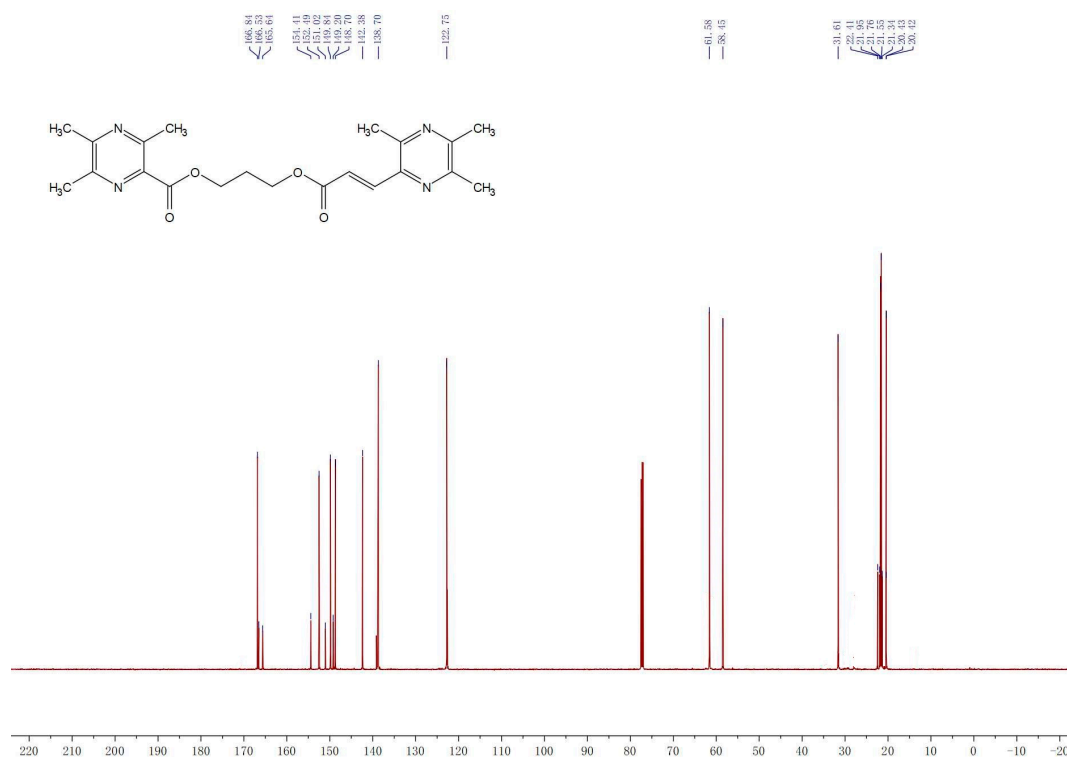

# HRMS spectra of 8q

Formula Predictor Report - 21.lcd

Page 1 of 1

Data File: I:\20170411-GY21.lcd

| Elmt | Val. | Min | Max | Elmt | Val. | Min | Max | Elmt | Val. | Min | Max | Elmt | Val. | Min | Max | Use Adduct |
|------|------|-----|-----|------|------|-----|-----|------|------|-----|-----|------|------|-----|-----|------------|
| H    | 1    | 0   | 60  | O    | 2    | 0   | 7   | P    | 3    | 0   | 0   | Cu   | 2    | 0   | 0   | H          |
| B    | 3    | 0   | 0   | 18O  | 2    | 0   | 0   | S    | 2    | 0   | 0   | Br   | 1    | 0   | 1   | Na         |
| C    | 4    | 0   | 50  | F    | 1    | 0   | 1   | Cl   | 1    | 0   | 0   | I    | 3    | 0   | 0   |            |
| N    | 3    | 0   | 5   | Si   | 4    | 0   | 0   | Ni   | 2    | 0   | 0   |      |      |     |     |            |

Error Margin (ppm): 20  
 HC Ratio: unlimited  
 Max Isotopes: all  
 MSn Iso RI (%): 75.00

DBE Range: -2.0 - 1000.0  
 Apply N Rule: yes  
 Isotope RI (%): 1.00  
 MSn Logic Mode: AND

Electron Ions: both  
 Use MSn Info: no  
 Isotope Res: 10000  
 Max Results: 500

Event#: 1 MS(E+) Ret. Time : 1.067 Scan#: 161

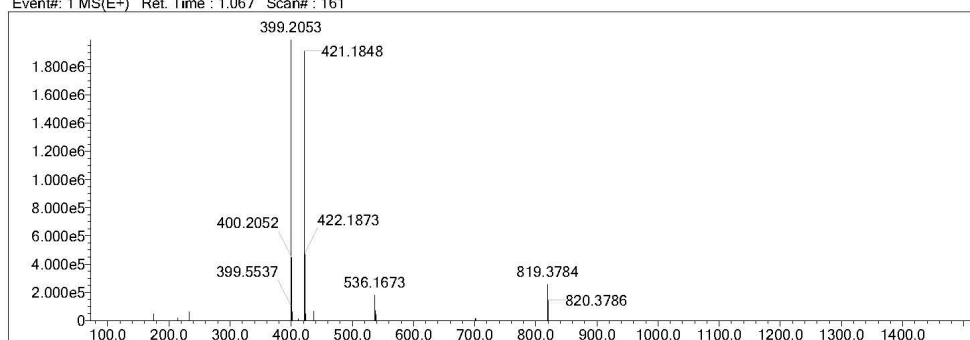

Measured region for 421.1848 m/z

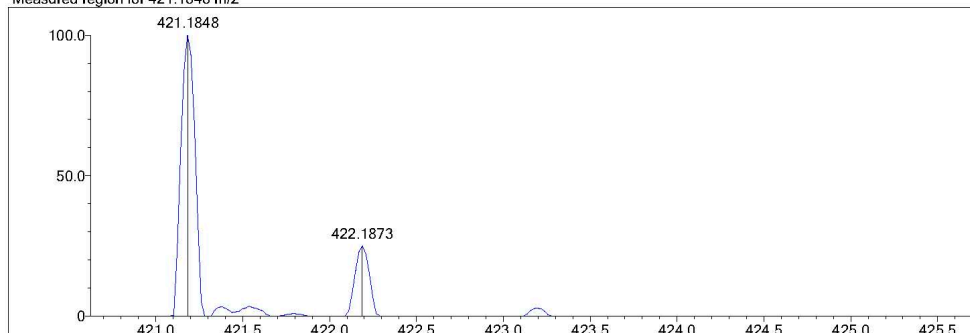

C21 H26 N4 O4 [M+Na]+ : Predicted region for 421.1846 m/z

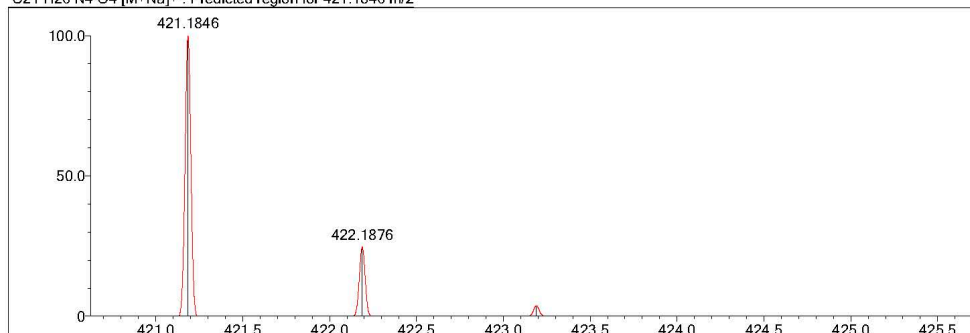

| Rank | Score | Formula (M)   | Ion     | Meas. m/z | Pred. m/z | Df. (mDa) | Df. (ppm) | Iso   | DBE  |
|------|-------|---------------|---------|-----------|-----------|-----------|-----------|-------|------|
| 1    | 91.51 | C21 H26 N4 O4 | [M+Na]+ | 421.1848  | 421.1846  | 0.2       | 0.47      | 91.51 | 11.0 |

$^1\text{H}$  NMR (300 MHz,  $\text{CDCl}_3$ ) of **8r**

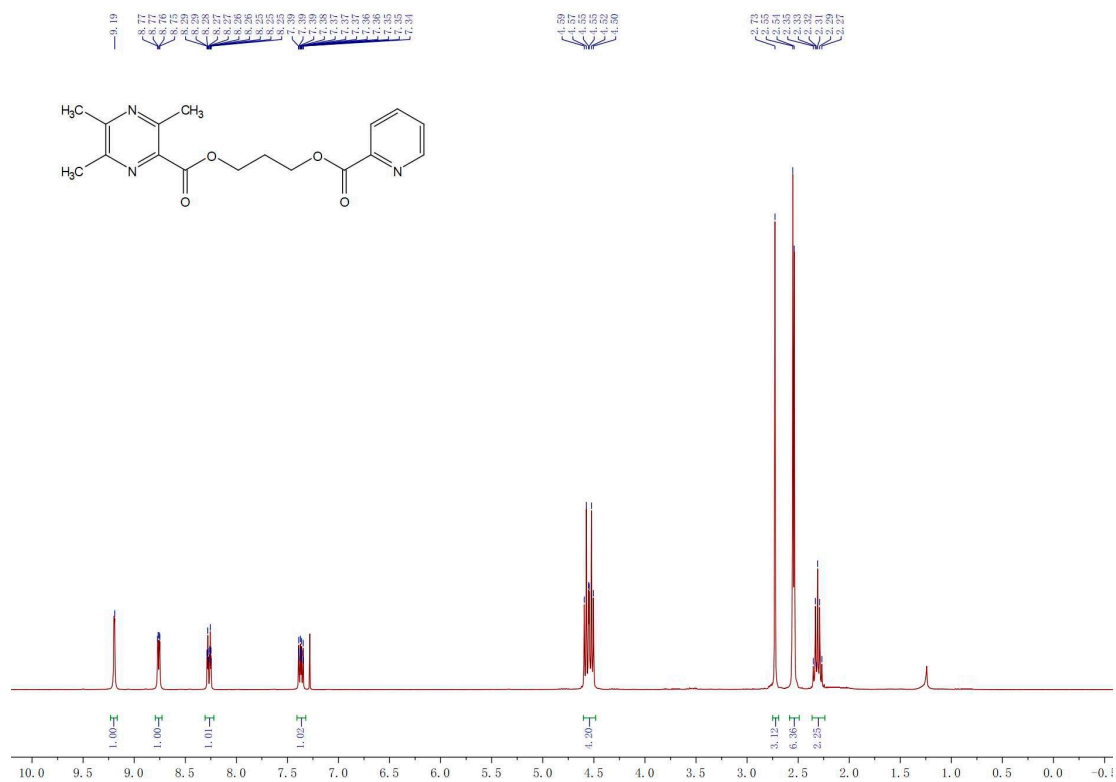

$^{13}\text{C}$  NMR (300 MHz,  $\text{CDCl}_3$ ) of **8r**

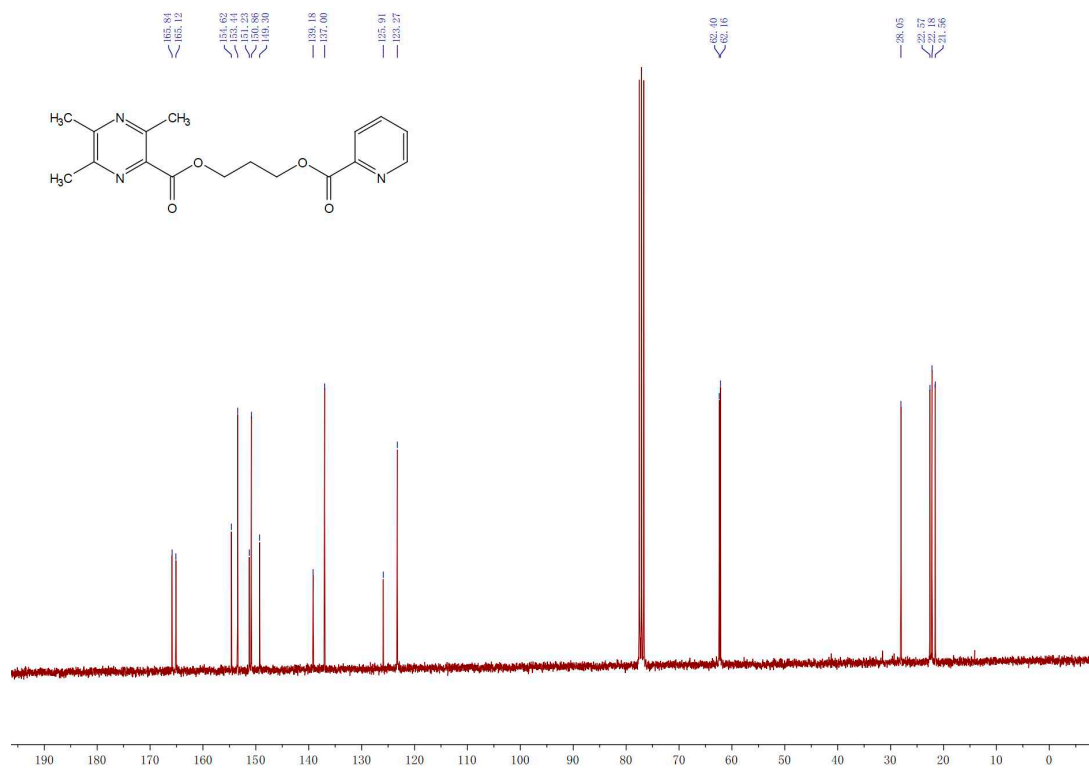



# HRMS spectra of 8r

Formula Predictor Report - 22.lcd

Page 1 of 1

Data File: I:\20170411-GY22.lcd

| Elmt | Val. | Min | Max | Elmt | Val. | Min | Max | Elmt | Val. | Min | Max | Elmt | Val. | Min | Max | Use Adduct |
|------|------|-----|-----|------|------|-----|-----|------|------|-----|-----|------|------|-----|-----|------------|
| H    | 1    | 0   | 60  | O    | 2    | 0   | 7   | P    | 3    | 0   | 0   | Cu   | 2    | 0   | 0   | H          |
| B    | 3    | 0   | 0   | 18O  | 2    | 0   | 0   | S    | 2    | 0   | 0   | Br   | 1    | 0   | 1   | Na         |
| C    | 4    | 0   | 50  | F    | 1    | 0   | 1   | Cl   | 1    | 0   | 0   | I    | 3    | 0   | 0   |            |
| N    | 3    | 0   | 5   | Si   | 4    | 0   | 0   | Ni   | 2    | 0   | 0   |      |      |     |     |            |

Error Margin (ppm): 20

HC Ratio: unlimited

Max Isotopes: all

MSn Iso RI (%): 75.00

DBE Range: -2.0 - 1000.0

Apply N Rule: yes

Isotope RI (%): 1.00

MSn Logic Mode: AND

Electron Ions: both

Use MSn Info: no

Isotope Res: 10000

Max Results: 500

Event#: 1 MS(E+) Ret. Time : 0.987 Scan#: 149

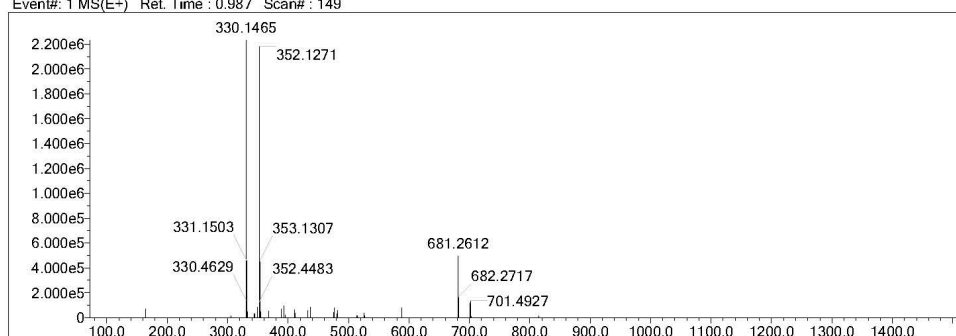

Measured region for 352.1271 m/z

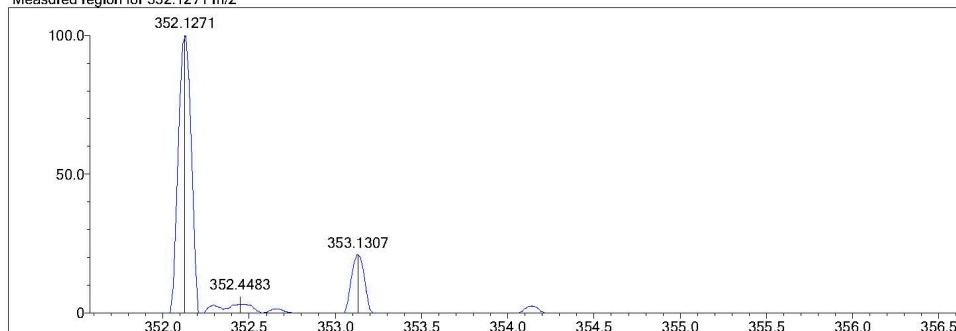

C17 H19 N3 O4 [M+Na]+ : Predicted region for 352.1268 m/z

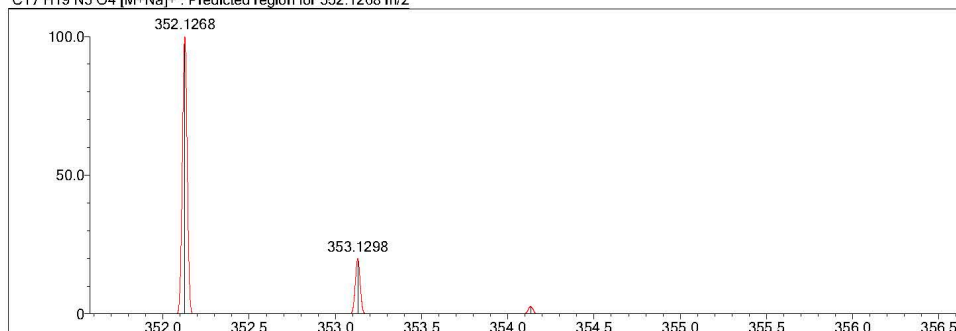

| Rank | Score | Formula (M)   | Ion     | Meas. m/z | Pred. m/z | Df. (mDa) | Df. (ppm) | Iso   | DBE  |
|------|-------|---------------|---------|-----------|-----------|-----------|-----------|-------|------|
| 1    | 86.72 | C17 H19 N3 O4 | [M+Na]+ | 352.1271  | 352.1268  | 0.3       | 0.85      | 86.72 | 10.0 |
